# Supplementary material for: Identification and Expression Analysis of microRNAs at the Grain Filling Stage in Rice(Oryza sativa L.)via Deep Sequencing
Source: PLOS journal article supplement (doi:10.1371/journal.pone.0057863), 2013-03-01
Supplement: S3 (10.1371/journal.pone.0057863.s003) [file journal.pone.0057863.s003]

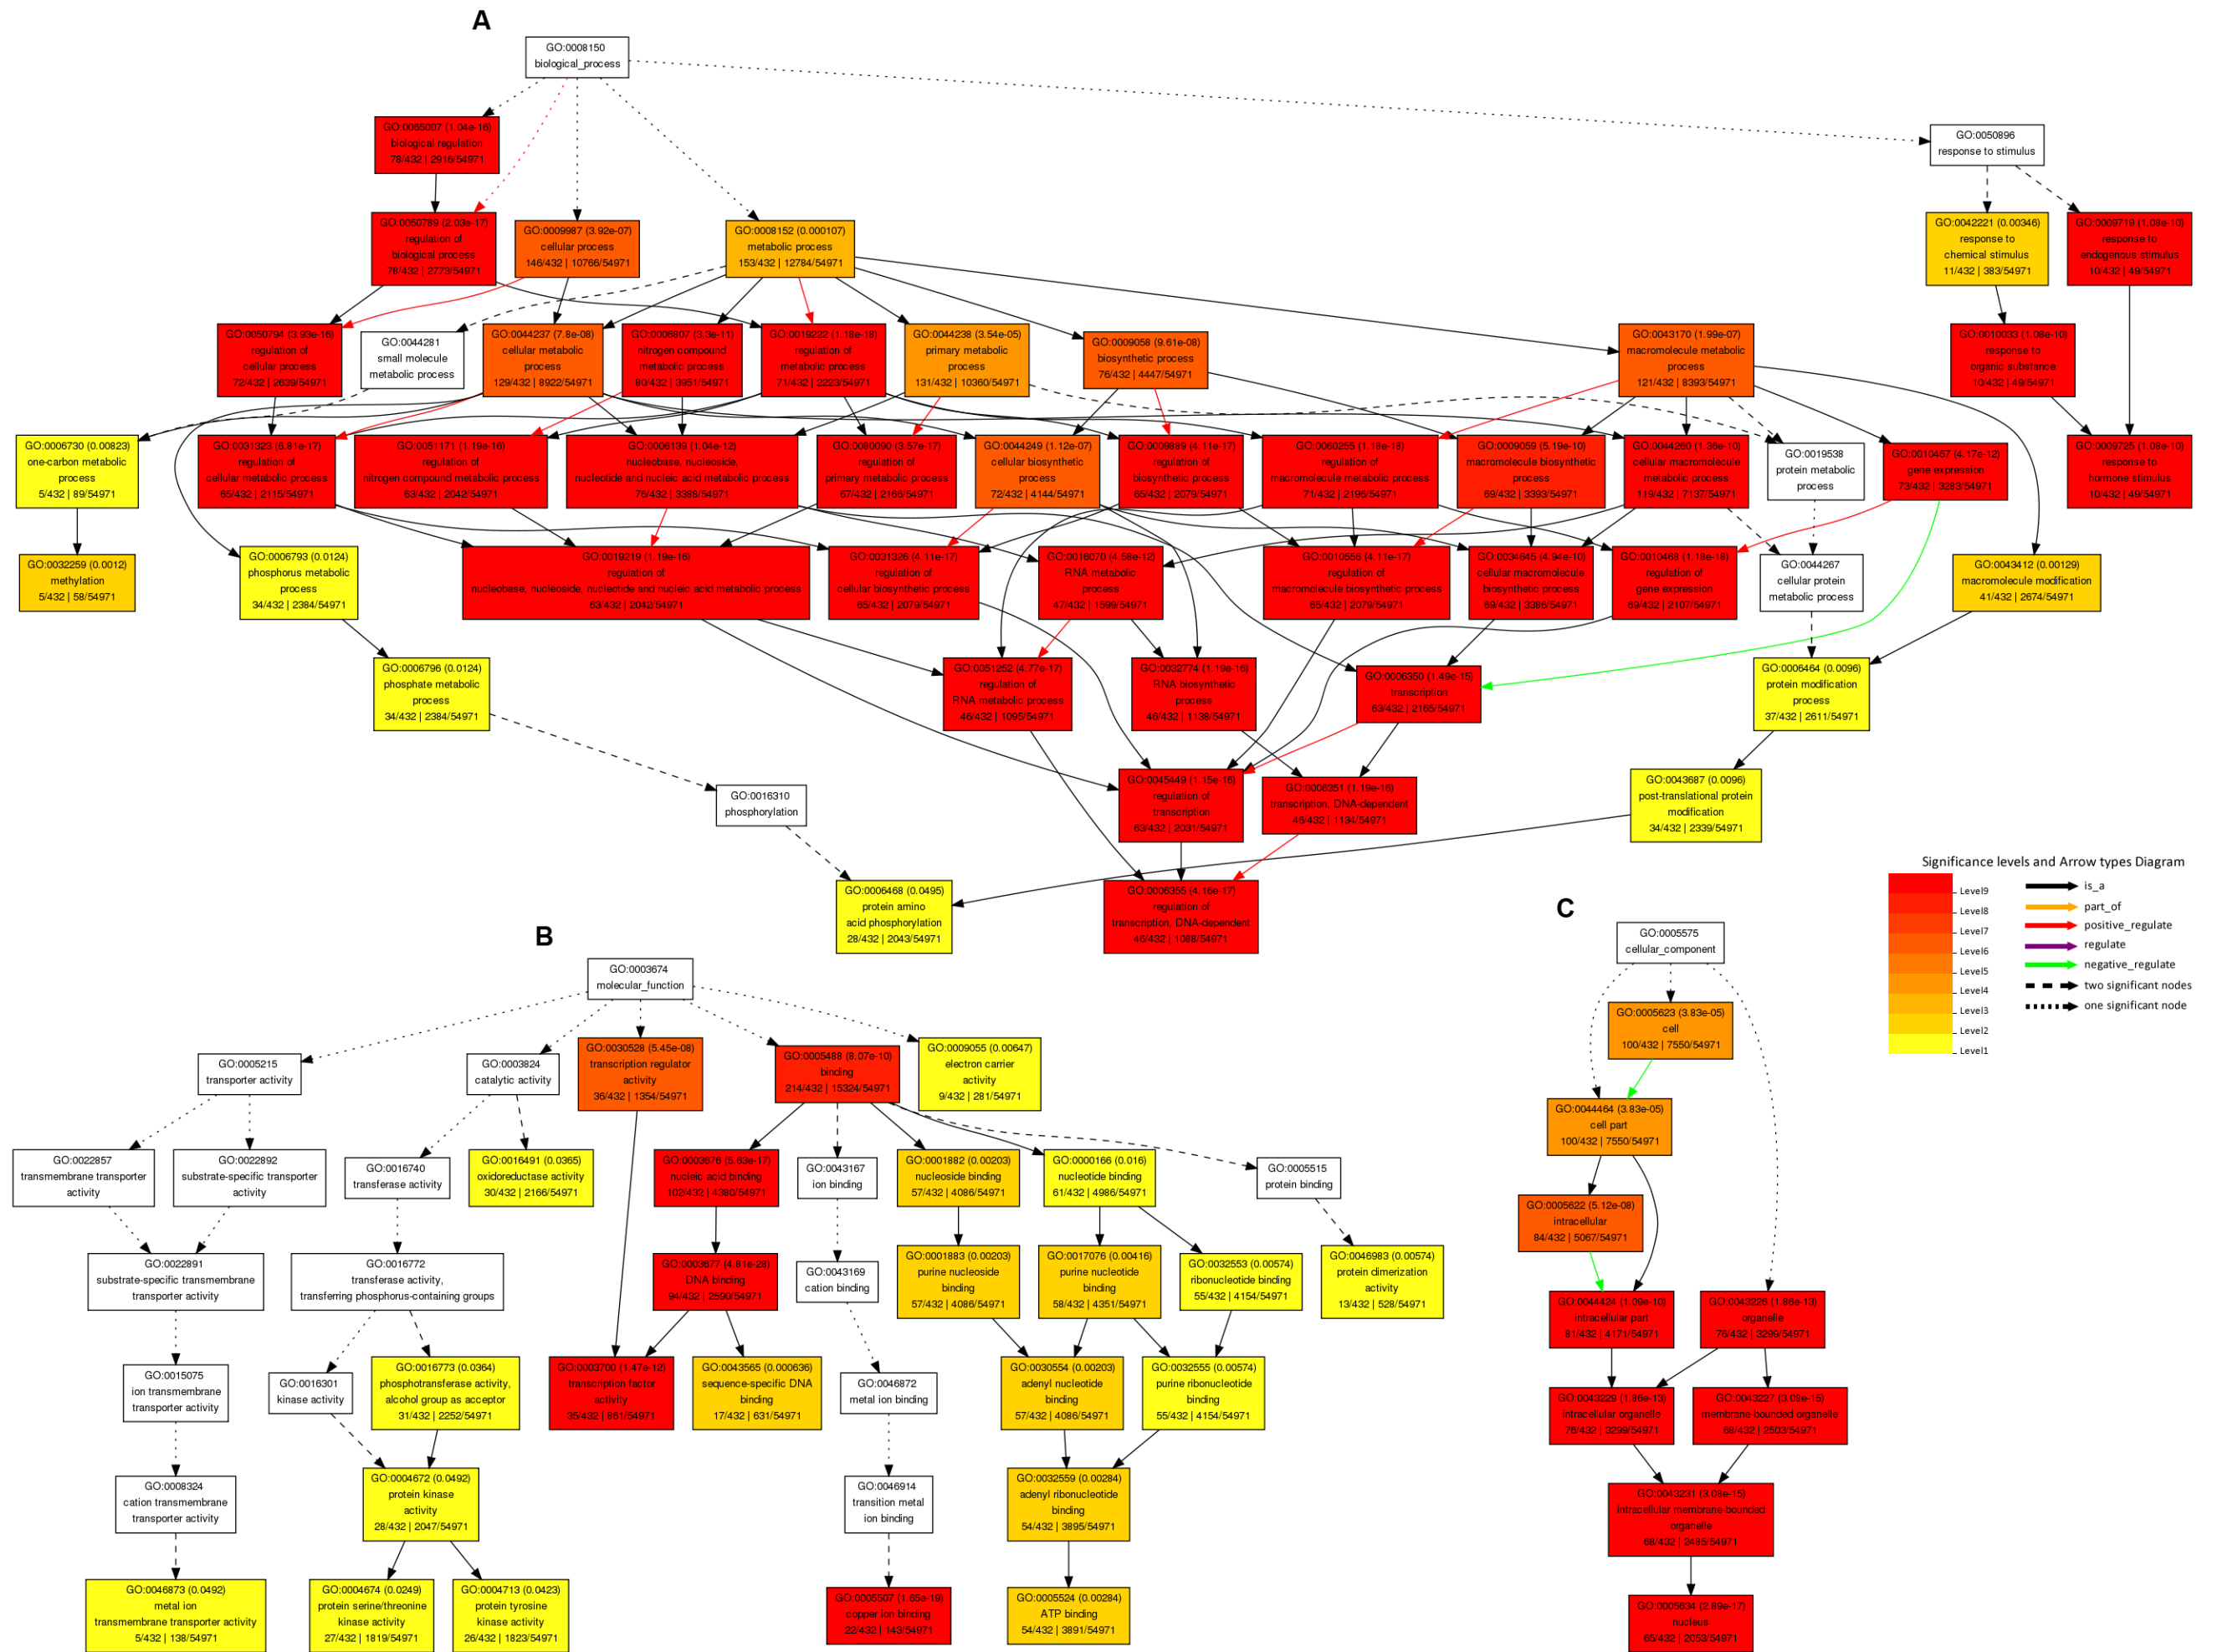

**Figure S3. Graphical results of GO analysis of the targets of the differentially expressed known miRNAs.** Targets with GO terms corresponding to (A) biological processes, (B) molecular functions and (C) cellular components. The GO terms and their serial numbers are represented as boxes. For each significant term, the box includes the GO term, adjusted *p*-value (in parentheses), item number mapping the GO term in the query list and background, and the total numbers of items in the query list and background. The color scale indicates the *p*-value cutoff levels for each GO term, where a higher statistical significance corresponding to a darker and redder the color.
