# Supplementary material for: Identification and Expression Analysis of microRNAs at the Grain Filling Stage in Rice(Oryza sativa L.)via Deep Sequencing
Source: PLoS One. 2013 Mar 1;8(3):e57863. doi: 10.1371/journal.pone.0057863 (PMC3585941; doi:10.1371/journal.pone.0057863)
Supplement: Table S3 — All predicted novel miRNAs. (XLSX) [file pone.0057863.s006.xlsx]

## Sheet: Sheet1
Supplementary Table S3. All predicted novel miRNAs
miRNA ID	location on genome	precursor of miRNA	mature miRNA	arm	locus	region	length	reads count				miRNA star sequence	arm	reads count
								5DAF	7DAF	12DAF	17DAF			5DAF	7DAF	12DAF	17DAF
Osa-1	chr01|13101:14939188:14939359:-	TAACCAACACATATAATATATTATAGGTGTCAGTTTTTCTCTTGAACCAGCACCTATAGTTACTTAAAGGTGCCTTTTTTTGTATTTTCAGTCTATGGAGGTGGGGAAAACACTATAGATGCCAATTTTAGATGTTCCGATACCTATAGTGCTGATCTGTATGTGTTTTTTT	ATATAATATATTATAGGTGT	5p	Intergenic		20	5	5	19	0	No
Osa-2	chr02|13102:4183143:4183237:+	GTATGTTTTGGACGGCTCTCAGACGAACGGGTGCTCTGCCGATCTATTCCATGGGCGAGCCACCCTTTGCAGAAGTGCCGAGAGAGACGCAGGCC	GACGGCTCTCAGACGAACGGGTG	5p	Intergenic		23	44	123	74	0	No
Osa-3	chr02|13102:12450906:12451130:+	TTGAGAGGCGTTTTGCTCAAGACCGCGCAACGATTCCATATGACACCGCATCGTTGTCCATGCCTATCATGTTCATCCAGAGCCCCTGTTGATCTTCAGATAAGAGAAAAGCTCAAAATTAAAGAAGGCTTGTTTATTGATCATGTCAAGGATAGGTATCGACGGCGATGCGCTGGCTATGGCCATGGTTGTGCGGTTCTTGCGCAATAACGTTTTGATCTCGAT	TTTTGCTCAAGACCGCGCAAC	5p	LOC_Os02g21009	3'UTR	21	12	6	5	0	No
Osa-miR5493 (Osa-4)	chr02|13102:22892175:22892431:+	CAGAGGCGGGCTCCGTGCCGGCCTGCCCAGCTGCAGATCTCGGATGTTTCCCTGAGACAAAAACAGAGAAGGAAGAGGCCCATGTAAGATGGGCTTTCAAGTCAGCTCAAGCACCCACTTCTCACTACCGATGTCCTCTACAAGCACTATTCCCTCGATTAGTACCATACCGCTTGCCGAACGACGCCAAGACCAGCTTAAATACGCGCTTCCCACCATCTCCACCAGCCGGGCTCGGTCGCGCGTGCCTGTTAC	AGCCGGGCTCGGTCGCGCGTG	3p	Intergenic		21	8	0	9	0	No
Osa-5	chr02|13102:34274499:34274685:+	ACATCGATCTGGCCCTCTTTGTGATCTTCCACAGCTTTCTTGAACTGCACGCATGATGAATAATCCCTTTGGTTAATTGTGATCTGGTCTCTGAGAGATCGTAGTTAGACTCGATCGGTTGCATTGGCATCAGAGAGAGCAGTTCAATAAAGCTGTGGGAAATTGCAGAGAGAGACCAAATCTCGTC	TGGGAAATTGCAGAGAGAGACC	3p	Intergenic		22	20	11	0	0	No
Osa-miR5340 (Osa-6)	chr02|13102:5683378:5683465:-	GAAAATGAAAGTCTGAAGATTTATTCATATCATCATGAGTAAATTATTTTACTTGTGATGACGTGGATGAATTTCAAACGTTTATTTT	TGATGACGTGGATGAATTTCAAA	3p	Intergenic		23	11	7	9	10	No
Osa-7	chr02|13102:18552430:18552643:-	GGGCCTTCCATGAGGACAAGAGCTGATTCGGTAGCCAAGGATGACTTGCCTAATGCCTATGTGCATGTGTTTATACGCTGCTCATCTGCATTTTGATTATCCCCTGATCAGTCCTGTCGTCAATTATATGTGTGTGTAGTACTCTGTACTCATACATATATAGGCATGTCTTCCTTGGCTATTCGGAGCGGCTCTTGTCTCTCGTGGAAGGCTG	TGAGGACAAGAGCTGATTCGG	5p	Intergenic		21	94	140	135	105	No
Osa-8	chr02|13102:19339231:19339428:-	GCCTGCACACAATACGGCCCATATGCTGTGTCCGGACTCGAATTCCCCGGCTTCCAAACCGCAGCACGCAGGAGCGTTTTTTTAGTACCACATCGCTTGTTCGAGGAGGCTGGGGCGGGAGAGCACGCTATAAAACCAAGGCCAGGTGCACCGTTGCTCCATACTTACCTGGACGGGGTCTATGGCCGATCATGAAGG	CCTGGACGGGGTCTATGGCCG	3p	Intergenic		21	75	185	8	117	No
Osa-9	chr03|13103:1624434:1624517:+	AACCCTCAGATTGGGGATTTCCTGCCGGAGGAAGCTTTTTGGAGGAGCTGCCTTTGGGAGGAACTCTTCCAGTTCTGAGGGTTT	TTGGGGATTTCCTGCCGGAGGAA	5p	LOC_Os03g03660	5'UTR	23	8	0	6	0	CCUUUGGGAGGAACUCUUCCAGUU	3p	0	0	1	0
Osa-10	chr03|13103:15638443:15638532:+	TTAGGGTATTAATGTATTATGGTCTTTTCTCCTCTCTCTCGTATAAAATATATTTTGTACGAGAGATGGGAAAAGACAACAATACCCCTA	TACGAGAGATGGGAAAAGACAAC	3p	LOC_Os03g27290	Intron	23	10	14	9	0	No
Osa-11	chr03|13103:1656121:1656461:-	GGAGATTGCATTTCTTGACTCGGGATGACTAGATATTGCTGACGTCACTAACTTTGTTCATCCTGGTACTCCTCTTGATGAGGAGGCCTCACAAAGGGGCACTTCTGTATATCTTGTTGGACAGCGAATTGACATGCTTCCAAAGCCTCTTACTGAAGGTATCTCTATTACTTATGTCGTATGCACACTGGATTAACCCAAAGCGGAACGTTTCTATTTCAATTTAAGAATACTCATATAATGTTAAAGTATTAG	TTTCTTGACTCGGGATGACTAG	5p	LOC_Os03g03710	CDS	22	13	0	0	5	No
Osa-12	chr04|13104:4406337:4406583:+	GAAGAATGATCTGATTGAGCCTCGTCAATTCTCCCTCTGGTTCCAAATGTTGGTCGTTTTAGAGCTGTGCACAGGAACTAAGAAGTGTTACAATTATCTTGTTGCCCTGCAATTATTGCAGATCAGTAGTGATACTTCATTTATTCATGAGAATCGTCGCATTCAATTATCAAGGGTGTCTGGGAAAAATGGGGTTCAATTGCCCCTGAAACAACCTACATTTGGAACCAGAGGGACTGTCGTTTTT	TACATTTGGAACCAGAGGGAC	3p	LOC_Os04g08270	Intron	21	31	0	118	125	No
Osa-13	chr04|13104:23375279:23375461:-	GTTGGTGTTTCCTTCTCTCCCCTTCTCCTCTTCCCCCCCCCTCTCTCTCTTCTCTCTTTTTTTTATATAATCAACTAATTTCTTGCTAATTTTTTTCCTTTGCTCCTATCTCTCTTATGGCTGTGTGGGAGTAGGAGAGAGAAAGCTGGGATGGATAGATAGAGAGGAAGAGAGGGAAGCCAA	TGGATAGATAGAGAGGAAGAGA	3p	LOC_Os04g39560	5'UTR	22	5	0	0	15	No
Osa-14	chr05|13105:866791:866904:-	CCCTCCAGTCAAATATATTTGATGTTGGGACTTGGGAGAGCTAAGTCAAATGTATTTGACATTGGGTGAGCTAAACTTAGGTCTCCCAACATCAGATATATTTGACTTGAGTGA	AAATATATTTGATGTTGGGAC	5p	LOC_Os05g02510	Intron	21	8	5	6	0	No
Osa-15	chr05|13105:3014430:3014514:-	AGCCAGCACGATAAGGACGTTTACAGTGCATACATGTGGCATTGACGTACATGTATGCCTGTAAACGCCCTTACCGTGCCGGCTT	ATAAGGACGTTTACAGTGCATA	5p	Intergenic		22	15	20	15	29	No
Osa-16	chr05|13105:22710968:22711219:-	ATCTAGGGTTTGGGTTTGGGTGGTGGTGGTGCAGGAGGGGGGAGGTGGGATGGCGGATGGGCCGGGGAGCCCGGGGGGAGGAGGGGGGAGCCACGAGAGCGGGAGCCCGAGGGGGGGAGGGGGAGGAGGGGGAGGTGGGGGTGGGGGTGGGGGGGTGAGGGAGCAGGACAGGTTCCTCCCCATCGCCAACATCAGCCGCATCATGAAGAAGGCCATCCCGGCCAACGGGAAGATCGCCAAGGACGCCAAGGA	TGGGTTTGGGTGGTGGTGGTGCA	5p	LOC_Os05g38820	CDS	23	13	0	7	0	No
Osa-miR5508 (Osa-17)	chr06|13106:637204:637356:-	GCTATTGAACTAGATGGCTGATCTGGTGTGGCTTGGCTTTGGGTAAGAAGGATTGGCCTCTGTCTAGTGCCTCACTTTCCTTCTGCGGTTCTGTCTACTGTCCTGGTTTGGAAGAAGTCAAACCAAGCCAGATCAGCCATCTAGTTGAGTCTC	TAGATGGCTGATCTGGTGTGG	5p	LOC_Os06g02130	Intron	21	6	5	18	7	No
Osa-18	chr06|13106:22961503:22961623:-	GGCCATCCCCTCGCCGCGGCTGGCATCAGCATTCAGCAGTGGCGCACGGCCGCCGCCGGTGCTGCTCTCTGCGGCGACCAATGCTTGGTCTGCTGGCGCGAGCGGCGGCGAGGACATGGCG	TCGCCGCGGCTGGCATCAGCA	5p	LOC_Os06g38670	Intron	21	9	11	5	7	No
Osa-19	chr08|13108:6852026:6852114:+	TTTTAAAAAAAATGGCATCTATAATATATTATAGATGTTGGTTTTTAAGTAACTGATGCCTATAATATATTATAGATGTTGGTTTTAGA	CCTATAATATATTATAGATGT	3p	Intergenic		21	7	0	10	0	AUCUAUAAUAUAUUAUAGAUG	5p	2	0	0	0
Osa-20	chr08|13108:5718281:5718494:-	GTCTATTTTCCCTCCCTCATCTCTTACTCTGATTGAATCGTCTCTGTTATGTGCAAAACCAGGTATAACGTCTCCCCATCTTCAAAAAATGGTAAAAAATCACTGAAGTAGTCGATTTTCACCGGTTTTCAAAGAAGAGATAGTCATTATACCTGGTTTTAAGGTTGAGGTAGACGAACCAATCAGGAGCAGAAGATGAGGGAGGCAAAATAGA	TCAGGAGCAGAAGATGAGGGAG	3p	Intergenic		22	8	0	6	6	No
Osa-21	chr09|13109:15610785:15611045:+	TACTTAATCTTCTCACTTTGGACTAGGTATTTTTGTCATTTTTTCATTTTGGACCACTCAAACTCTCTTCGTGATCACATCAACAGCCTCAAGCACATCGGCACCCTCATTCCGATGGTCTCCCCTTTTACGTTCAGCTCACATCTTTGCTGGAGGAGAGGTTGGCTAGAAAAAAGAGTTAGGGTGGTCCAAAGTGAAACAAAGGGGAAAAAAAACCTAGTCCAAAGTAAAAAAGATTGGATAGAGGGTGGTCGG	TCTCACTTTGGACTAGGTATT	5p	LOC_Os09g25990	Intron	21	35	62	85	100	No
Osa-22	chr09|13109:20111005:20111192:+	GGTGATCAGCATCTCGATGGTGATTGTTGCTAGGCGTAATCATACTATACCTTCTCTGCAAAGGAATTTCCCTTTCATCGTAGTAAGGTTGTGATTCTGGTGCAGTTAGTTGTGGCCTTTGTACAGCAGGAGTGGGAGCAGAAGCAGGAGCAGCAGCAGACATTTGCGGAATGTGTAATACTACACCG	ATCTCGATGGTGATTGTTGCT	5p	LOC_Os09g34070	CDS	21	5	0	0	7	No
Osa-23	chr09|13109:6945607:6945784:-	ATAGGAAACTCACAAGATAATTTTTATTACTGACAATAAGTACCATAATATAGAGTGATATGGCTATGTATAAATGAAGCTATTTTCTACTACTTAAAAAAACAAGACTTACAAAGATTTAAATGACTTAAATGCACTACATGTCTTCAGTGGCAGAGCTTAGTGGAGGCCATCCTAG	TCAGTGGCAGAGCTTAGTGGAG	3p	Intergenic		22	8	9	0	0	No
Osa-24	chr10|13110:14149079:14149186:-	TGTAGGGTTGGGAGACATCTGGATATCACTTCTGATGTATTCCTTGGTGTAAGCTACTGAGATTTGGTATGGTAGTTTCTGTGGCACTTGCACAAGGACCAGTTTTAT	TCTGTGGCACTTGCACAAGGA	3p	Intergenic		21	9	5	0	0	No
Osa-25	chr11|13111:5399585:5399707:+	GAGACCAAGTCTCTGTTTACACCGTCCTCAAAACATGACAGGTAGACATAACTGCCATCTACAAGTAGTTAATTCTAGAGTACGTTAGTGCTTTGAGTAGGGTCTAAACAGAGACCTGGTCTA	CTTTGAGTAGGGTCTAAACAGAG	3p	LOC_Os11g10060	Intron	23	121	71	83	69	No
Osa-26	chr12|13112:1969860:1970197:+	AATTGCATAATGCTCCGGATATTATGGCATGTAGCATATAACCCTAGTCATTATGGTATCAAGGTTTCGCAAAACCCAGCATTCACTCAAATCATAAAAAAAACAACTTGTTGACACATATTCACTTCATTTTTCATGCCATAAACCACTATGTATTGTTCAAATGTTGGTTACTTGATCAGGATGACCAGTTTAATCAGTCAACGTTTTGAACATTATTATGTCAAGGATGGTAAAATTAGCTGAAATTTGAAC	TGCTCCGGATATTATGGCATG	5p	LOC_Os12g04650	3'UTR	21	82	119	175	134	No
Osa-27	chr12|13112:7986915:7987137:-	ATGAGGTCCGAACATAGCTCCTCAAATTTGGCTCTGGAGAGAGTTGTCTCGATGTGTTTAGGCCCATCAGCAGTAGCAGTTATGAAAGGCAAGCTGCAATTCAAGACATTCAATTATTTAAGAAGAAAAATCACCAAATGAGCAATAGAATACTCTGTGAGAACAATTGGAAAGAAGCTCACCTAATGTTTGTCTGAGACAGCGTAGACAGTTCCATCTTCGC	TCTGAGACAGCGTAGACAGTT	3p	LOC_Os12g14070	CDS	21	28	31	14	10	No
Osa-28	chr01|13101:20988042:20988343:-	ACCTAGCTCCTCTGGACATATTACTGTGCTGTTGCCTCAAATTTCCGGAGCATGTCGCAGTGCGGCGTCTCGTAGGAAAGCCCCCAGTGGCGACGCTGCACCTCAACCCTACAATTCTGTGAGAGTATTGAGAAGTAATCCCGCTCAACATGCCGTTCGAGTGTTGCACGCTCAGTGCTCTGGTGTGGATACTGCTCCTCAAAGTTAGGCAACTTGACATAGTATGTGACTCCACGTGTGGTTTGGAATTTGTGC	GGGACAGCGAGTAGACCGGTT	3p	LOC_Os01g37560	CDS	21	0	6	6	0	No
Osa-29	chr02|13102:24114085:24114226:-	GGGCGCTGGGCGGTGACAGAAGAGAGTGAGCACACGGCCGGGCGGAACGGCACCGGCGGATGTGCCGTCGCGGCCGCGTGCTCACTGCTCTGTCTGTCATCCACTCCTCTCCCACCCCCCTCCACCTCCGGCCGGCGCGCCC	CGGTGACAGAAGAGAGTGAGCAC	5p	Intergenic		23	0	5	17	9	GCUCACUGCUCUGUCUGUCAUCCACU	3p	0	1	5	2
Osa-30	chr03|13103:30539826:30539973:+	AGGGAAGGAGTGAAACTGTCACAGCATGATCTAACCATCACGTACTCAGAAGAAGCCTCAGCTAGCCGCCTTCCTGTTCGAAACCAGCGAGCTGAGCTGATTTCTTGTCTGCAAGTTAGATCATGCTGGCAGCTTCACGCTTTCTCTT	TGAAACTGTCACAGCATGATCTA	5p	Intergenic		23	0	5	5	0	No
Osa-31	chr03|13103:35116874:35116981:-	TTGCCTCTTGGCAGAAAATTTTCAAGAAAAAGCACCTTAGTAAAGGTCTCCTTCCTTGTGAGTATGGATGACGCAGTCGGACTTAGGGTAGGAGACACATGTCAGCAC	CGGACTTAGGGTAGGAGACAC	3p	LOC_Os03g61960	CDS	21	0	9	9	0	No
Osa-32	chr04|13104:28321091:28321165:+	TTCAAGGCTTTACAAAAGCAAGGGAACTGTTTTATTCTCCTTTTTATAAAATGTCTCTTCGTTTGTAGAGATGAT	ATAAAATGTCTCTTCGTTTG	3p	Intergenic		20	0	17	16	0	AAAGCAAGGGAACUGUUUUAUUC	5p	0	1	0	0
Osa-33	chr04|13104:20638203:20638329:-	GATCAGATTGCATCGGCATCTCTACTCTGCAGCCGCTGCCTCTGCCGCCTCTTTCATCCGCTGTCCGTGCGACGGCAAGAGAGTGTTGACAGCGGCTGCGAAGTAGAGATGCCGACTTGATCTGAGC	TGCGAAGTAGAGATGCCGACT	3p	Intergenic		21	0	12	20	21	No
Osa-34	chr05|13105:2597903:2597974:+	GCAAATTTTACAATGGGAGTAGATGGGGTGGCAGATTCACTGCCACCACCACTAGCTCATTTTAAAGGAATA	CAATGGGAGTAGATGGGGTGGCA	5p	LOC_Os05g05270	Intron	23	0	6	6	0	No
Osa-35	chr05|13105:22575726:22575822:-	AAAAAACTTAATCTAGTAATTGGATAGGACATAATCTGGATATCCAGATTCGTTGTATTAGATTATGTCCTATCCAAGTACTAGGTTGAGTTTTTTT	ATCTAGTAATTGGATAGGACA	5p	Intergenic		21	0	62	271	422	No
Osa-36	chr07|13107:15419331:15419413:-	AAAAAACTCAACCTAATATGGGATGTGAAGTCTGACCAAATTTATTATAATTATGTCACATCTCATACTAGTTTGGGTTTTAT	ACCTAATATGGGATGTGAAGT	5p	Intergenic		21	0	13	12	0	No
Osa-37	chr07|13107:18539276:18539529:-	GAAACGGAGAGAGTAGATTTTAGGAAGGCAGCACCATACCTGCTTGGGAGCGTGGAGTTGGAAGAGGCGCACGGGGGGGGGGGGGGGGTCGAAGATGGGCATAAGCCCCTGCGACAATGGCCATCTCGCCCACGCCGGCCACCACCACCTCCGATTCCAAGCTCACCGTTGACTTCTTCATCCTCCCCTCCAACTCCAAGCAGGTATGGCGCAGCCTTCTTGCTGCTTTCCTAAAATCTACTCTCTCCGTTTCT	GAGTAGATTTTAGGAAGGCAG	5p	LOC_Os07g31310	Intron	21	0	7	13	9	No
Osa-38	chr08|13108:15595227:15595489:+	GGACTAACGGTCCCGCGGCTCCAAAACACGCCACCATGGTAGCAAGTGATTTTTTTTACCGTGTCGGTACTGCTTAGTACTGTTTTGACACTATGTTTGCACTGTTTGGAACTGTTCACATGTTGGTTCCCGGCAGTAAAACTGCTGGAACTAACATGTGAACAGTGTCAAACAGTGTCAAATAGTGTTTCAATAGTGCCAAAAAGTATTAATTCGATGTCTACCGCGGTGGCGTGTTTTGGAGCCGTGGGACCA	CGTGTTTTGGAGCCGTGGGAC	3p	LOC_Os08g25624	Intron	21	0	13	10	0	No
Osa-39	chr08|13108:1727078:1727242:-	TCCATATGAGAGACCGATTGGTCTCGCTGTTCTGTTCTGCGAGACAGGGTGTAGCGCGCGACACCGCGCGGTCTCGCACTATCCCCGCGCGACATCACCTGCGTCGTCATGCTCATGTCATTTTCGCTCAATGGTTCAGCGAGATCGATGGTATATTTATGCCAA	TCAGCGAGATCGATGGTATA	3p	LOC_Os08g03650	Intron	20	0	64	83	0	No
Osa-40	chr09|13109:1806041:1806347:+	CCACTAAACTTTTAAATTGCAGATTTAGGTTCTTAAACTTGTTTATCATAACTCTCTAGAGAGCGATGTGATATGCCAACTTAGAGCCGACATGGTGTGTGGGAACACATAAGCTATGTGTGAGCTTGGTATAGATGGGATATATGCATATATTCCCTTCTACACTGCTCATGTCATCTTGTATGTCACGTCAGCTCCAAGTTAGCATGCCACATAGGCTCTTGAAGAGGGTATGGGCACATTTGGACTCATGAT	TTTAAATTGCAGATTTAGGTT	5p	LOC_Os09g03620	Intron	21	0	10	11	0	No
Osa-41	chr09|13109:21238989:21239249:-	AGGCGTGGAGGAGCACCACTGGAATCCGCGCGCTGCCGATTGCGCACAGGAATCAGATCGAGAAATGCAGAGAGAGATGGGAATAGGAAGAGGAAGAGGAGAGGAGGAGGAGGGGAATTGGAGGGAAAGGGGGGGATTTCGGCAGGAGCAAGTGAGAAGTTTTGGAGGGAAAAAGTTGAAAAGTTTTGTTTATAGGATTTATAAAACTATTTATAAATATTGGCATGAAAGGGCGTTTGGTCTAGTGGTATGATT	GGGCGTTTGGTCTAGTGGTAT	3p	Intergenic		21	0	17	29	0	No
Osa-42	chr10|13110:11792586:11792675:+	ACGTGCAGCAGGACGATCAACGCGTTCCCCAATTATCTTCGACACTTCTTGTGTGATAATTGGGGAACGCGCCGATCGTCATGCTGTACG	TTGGGGAACGCGCCGATCGTC	3p	Intergenic		21	0	16	26	24	No
Osa-43	chr10|13110:22150551:22150625:+	GGTAATGGAATACGTCGTGTACTGTAGGGCAGGTGGTTAGCGTACCTGAACTGCAGAACTGGCGATGCTAGAATT	ACCTGAACTGCAGAACTGGCGA	3p	LOC_Os10g41340	3'UTR	22	0	6	0	6	CGUCGUGUACUGUAGGGCAGGUGG	5p	0	1	0	0
Osa-44	chr11|13111:19013830:19013961:+	AACGGCACGGTTTTCTTGGATCTCTCTCTCCCTTGAAGGCTATCTCATGGAGGTTTGATGTACACCATTGTTGCCTAAGAAACTGAGAAAGCCTTCGGGGGAGGAGAGAAGCCAAGCAAGCCACAGTGTCTA	TCTCTCTCTCCCTTGAAGGCT	5p	Intergenic		21	0	22	0	11	CUUCGGGGGAGGAGAGAAGC	3p	0	20	0	0
Osa-45	chr11|13111:3080883:3080993:-	CCTGGCCTGGGGTTGATCGACGGGGGCGTCAATCTCTCTTAAGGGGGTGAGGGTGTAACATCCCCGTCGATCTCTCTTAAGGGGGTGAGGGTGTAACATCCTGGCCCAGGG	GGTTGATCGACGGGGGCGTCAA	5p	LOC_Os11g06400	Intron	22	0	9	12	16	No
Osa-46	chr12|13112:19099339:19099484:-	GTGCAATTTGGTTGGCTCAAAGGCTGATCCACTCCAGAGGAGGTTTCGTAGGACAGATCCCCTCGATTCATTGTCACTCGTTCATGGATCATCCCGATGAACATCCTCAGGAGTGGATTGGGCTTCAAGACAGCAAATTATACTTC	CTCAGGAGTGGATTGGGCTTC	3p	LOC_Os12g31790	Intron	21	0	12	0	12	AGGCUGAUCCACUCCAGAGGA	5p	0	8	0	6
Osa-47	chr04|13104:4120180:4120346:-	TGGTTTCGGGAGGTCTGGTCGAAGGGTTTCATGACATACCACTAACAAGCCCCACACTGGCAAGGGTGAGATAGGAGCTTCGACCGAGACCAGATGAAAACCATGCGGTATGGATATGAGGTTGGCGGTATGTGGTGAGACCCTTCTACCAGACTAGCTGAAACCAT	AGGTCTGGTCGAAGGGTTTCA	5p	LOC_Os04g07760	Intron	21	0	7	13	7	No
Osa-48	chr01|13101:7445343:7445423:-	CAAAAAAACCCCCCAATCCTAGGGATGTATCTGGACAACGTGTATGTCTAGATATATATCTAGGATTGGATTTTTTTTTTT	TAGATATATATCTAGGATTGGAT	3p	LOC_Os01g13360	Intron	23	0	0	36	32	CCAAUCCUAGGGAUGUAUCUGGA	5p	0	0	9	7
Osa-49	chr02|13102:33675293:33675469:+	TTGCTGCTGCTGCTGTTCGGAAGCTATGGCATTGCAAGAAGAAGAGGAGGATGATGAAGATGATGAAGAAGGGGAGAAAGAAGAAGAAGAAGACGGTGTCAGGGTGCGTGGGGAGCTCTGATTTCTCCTTGTCCTGAGGTGTGCTGTCCACTTGTGGATGTAGTAAGATATTGGCAC	TGCTGTTCGGAAGCTATGGCA	5p	LOC_Os02g54974	3'UTR	21	0	0	6	8	No
Osa-50	chr03|13103:12471233:12471332:+	GTCCACAAATATTATCATAGATGTACCGCTGATTTCCGTCTTTCAGAGTATATATTGTGAGACGTATTCATGGGGTGTAAGTATGGTGTTACGTGTGTAG	TCATGGGGTGTAAGTATGGTGTT	3p	Intergenic		23	0	0	23	16	No
Osa-miR5152-5p (Osa-51)	chr05|13105:28847385:28847623:-	TCACGAAGAAATTATTAAAGGTAGGGATAGGCATGATCTCTTTCTCACCAAATTTCTAAGACCAAACTCAACTTCGTTTGGAAAGTTAAAATAAGACAAATTTTGCATGAAACTTCCCTATCACTATCCGTGCAAAGTTTGTATTTCTTGTATCTTGCAAGCAAATTTGAATTTGGTCTTGAAATTTTGTGGAGATATAGACCATGCCTATACCTACCACTAATATTTATGGATGAGAG	GTAGGGATAGGCATGATCTCT	5p	LOC_Os05g50420	Intron	21	0	0	125	81	AGACCAUGCCUAUACCUACCA	3p	0	0	14	0
Osa-52	chr06|13106:27236997:27237079:-	TTCTTAGGCCTGATCTTGTGGCAAGAACTGAGTAGTTCGTTAACTCGCTACGCGGTTCTTGTCACAAGACCGAGCCCGTGAAT	TGATCTTGTGGCAAGAACTGAG	5p	Intergenic		22	0	0	20	39	No
Osa-53	chr08|13108:20235409:20235571:+	CCAAACTATGTAATGCAAAGAAACACAAATCAGCACTTCAGCAGTACATCACATCATCATCCTCCTCAGCCTCATCTTCAGCCTCATCCTCCTCCTCAGCCTCATCTTCATCATCAAGTGCTGCTCAAGTGTTGATTTGTGTTTCTTTGCATTATATGGTTTG	TGATTTGTGTTTCTTTGCATT	3p	Intergenic		21	0	0	13	17	UGCAAAGAAACACAAAUCAGC	5p	0	0	2	0
Osa-54	chr09|13109:15791336:15791549:+	TGGCATGCCATGTGTAGCCACATTGTAAGGGAGTCCTTGTGCACATGGTCAATCTCGCAGAAAGCCCACTGCAATCCAAATCTTCTTCACGATTGTTCCTATTCACCAAATCACCCGTCTTCTCGAATGACCGCCCACCATTTCCCTCTGTTGCTGTTGCTAACATCCATGGCCCAGGGACCCACTTGCAGCGTGGCTACATGTGGCATGCCAC	TGTGTAGCCACATTGTAAGGG	5p	LOC_Os09g26190	Intron	21	0	0	11	12	ACUUGCAGCGUGGCUACAUGUG	3p	0	0	1	3
Osa-55	chr07|13107:19976424:19976523:+	GTCTATAATGTGCCATTAGGTCAATCAGCCAGCTCTGGCTCTTTGCATACCAGATAAACTAGCCAGAGCTGGCTGATTGACCTAATGGCACAAACCGTAG	TGGCTGATTGACCTAATGGCA	3p	LOC_Os07g33420	Intron	21	5	7	10	10	No
Osa-56	chr07|13107:22129848:22129933:+	AAGGCCCACATCTTATTGGGTCGTGCCTAGGCCGTAGGTACAACCTGTGGGCTGGCCCAGCACAGCACGAAGAGTATCCGGGCCAT	TCTTATTGGGTCGTGCCTAGGC	5p	Intergenic		22	27	20	0	0	No
Osa-57	chr10|13110:1404024:1404102:+	ATATTCCCTCCGTTTCAAAATAAATTAACCTCGTAAAATATTTTATATGAGATTGGTTTATTTTGGGATGGAAGAAGTA	TGAGATTGGTTTATTTTGGGAT	3p	Intergenic		22	10	10	0	0	No
Osa-58	chr03|13103:18386032:18386141:+	TACGGGCCCCATAGCTTGCACTGTGAGAGGCCTAATCACAATGGTGTAGACCGCGTGCTGAACTAAGCACATTGCTGCCACTCAGGTAGTCGTAGCTATGGGTGGCAATG	ATAGCTTGCACTGTGAGAGGCCT	5p	Intergenic		23	0	12	0	23	No
Osa-59	chr06|13106:9231124:9231271:-	TTCCATGCGGTTCGTAAGTGGAACCGCACGGGAAAATAGGGGGACCGGTGCCGGATTATCGCCCGCACGGGAAAATACATTTTCCTATGCGGGCGTCTTAATCCGATTCATTATCCCGTGCGGTTGATTTAAGAGGACCGCACAGAAA	TTCGTAAGTGGAACCGCACGG	5p	Intergenic		21	0	6	0	10	No
Osa-60	chr07|13107:11147116:11147212:-	AATCAATTTTCTGCACGTCATCAGGCAAGAAAATTAATCATGCTAAGTTAAAAGAATGATTAAAATTCTTGTCCTGATGATGTGCAGAGAATTGAGG	CTGCACGTCATCAGGCAAGAA	5p	LOC_Os07g18820	Intron	21	0	9	10	11	CTTGTCCTGATGATGTGCAGAG	3p	0	1	0	0
Osa-miR5493,Osa-miR5340,Osa-miR5508,Osa-miR5152-5p have been reported during draft preparation.
