# Supplementary material for: Identification and Expression Analysis of microRNAs at the Grain Filling Stage in Rice(Oryza sativa L.)via Deep Sequencing
Source: PLoS One. 2013 Mar 1;8(3):e57863. doi: 10.1371/journal.pone.0057863 (PMC3585941; doi:10.1371/journal.pone.0057863)
Supplement: Table S7 — Predicted targets of differentially expressed known miRNAs. (XLSX) [file pone.0057863.s010.xlsx]

## Sheet: 103 miRNA_degradome target
Supplementary Table S7. (A) Predicted targets of differentially expressed known miRNAs from degradome data (Yang et al., 2011, Nucleic Acids Res, 39:D202-D209)
miRNA	Target accession	CleaveLand score	Target description
osa-miR1425	LOC_Os10g35240.1	3.5	Rf1, mitochondrial precursor, putative, expressed
osa-miR1425	LOC_Os10g35240.2	3.5	Rf1, mitochondrial precursor, putative, expressed
osa-miR1425	LOC_Os04g28010.1	4.5	expressed protein
osa-miR1425	LOC_Os04g28010.2	4.5	expressed protein
osa-miR1425	LOC_Os05g40700.1	4	transmembrane protein 56, putative, expressed
osa-miR1425	LOC_Os08g45130.1	4.5	histone-lysine N-methyltransferase, putative, expressed
osa-miR1427	LOC_Os01g07780.1	4.5	embryo-specific 3, putative, expressed
osa-miR1427	LOC_Os05g35480.1	4	anthranilate phosphoribosyltransferase, putative, expressed
osa-miR1428b	LOC_Os10g26600.1	4.5	soluble inorganic pyrophosphatase, putative, expressed
osa-miR1428c	LOC_Os10g26600.1	4.5	soluble inorganic pyrophosphatase, putative, expressed
osa-miR1428d	LOC_Os10g26600.1	4.5	soluble inorganic pyrophosphatase, putative, expressed
osa-miR1428e-3p	LOC_Os03g17980.1	4	CAMK_KIN1/SNF1/Nim1_like_AMPKh.2 - CAMK includes calcium/calmodulin depedent protein kinases, expressed
osa-miR1428e-3p	LOC_Os03g17980.2	4	CAMK_KIN1/SNF1/Nim1_like_AMPKh.2 - CAMK includes calcium/calmodulin depedent protein kinases, expressed
osa-miR1428e-3p	LOC_Os05g02310.1	4.5	soluble inorganic pyrophosphatase, putative, expressed
osa-miR1433	LOC_Os08g27100.1	4.5	conserved hypothetical protein
osa-miR1433	LOC_Os09g15420.1	4.5	NAD dependent epimerase/dehydratase family protein, putative, expressed
osa-miR156l	LOC_Os07g32170.1	3	OsSPL13 - SBP-box gene family member, expressed
osa-miR156l	LOC_Os07g32170.2	3	OsSPL13 - SBP-box gene family member, expressed
osa-miR156l	LOC_Os02g04680.1	3	OsSPL3 - SBP-box gene family member, expressed
osa-miR156l	LOC_Os02g04680.2	3	OsSPL3 - SBP-box gene family member, expressed
osa-miR156l	LOC_Os02g07780.1	3.5	OsSPL4 - SBP-box gene family member, expressed
osa-miR156l	LOC_Os02g07780.2	3.5	OsSPL4 - SBP-box gene family member, expressed
osa-miR156l	LOC_Os06g45310.1	3.5	OsSPL11 - SBP-box gene family member, expressed
osa-miR156l	LOC_Os06g49010.1	3.5	OsSPL12 - SBP-box gene family member, expressed
osa-miR156l	LOC_Os06g49010.2	3.5	OsSPL12 - SBP-box gene family member, expressed
osa-miR156l	LOC_Os06g49010.3	3.5	OsSPL12 - SBP-box gene family member, expressed
osa-miR156l	LOC_Os06g49010.4	3.5	OsSPL12 - SBP-box gene family member, expressed
osa-miR156l	LOC_Os06g49010.5	3.5	OsSPL12 - SBP-box gene family member, expressed
osa-miR156l	LOC_Os06g49010.6	3.5	OsSPL12 - SBP-box gene family member, expressed
osa-miR156l	LOC_Os11g30370.1	2.5	OsSPL19 - SBP-box gene family member, expressed
osa-miR156l	LOC_Os01g69830.1	2.5	OsSPL2 - SBP-box gene family member, expressed
osa-miR156l	LOC_Os03g57040.1	4.5	clathrin adaptor complex small chain domain containing protein, expressed
osa-miR156l	LOC_Os03g57040.2	4.5	clathrin adaptor complex small chain domain containing protein, expressed
osa-miR156l	LOC_Os04g46580.1	3.5	OsSPL7 - SBP-box gene family member, expressed
osa-miR156l	LOC_Os08g39890.1	2.5	OsSPL14 - SBP-box gene family member, expressed
osa-miR156l	LOC_Os08g41940.1	2.5	OsSPL16 - SBP-box gene family member, expressed
osa-miR156l	LOC_Os09g31438.1	2.5	OsSPL17 - SBP-box gene family member, expressed
osa-miR156l	LOC_Os09g32944.1	2.5	OsSPL18 - SBP-box gene family member, expressed
osa-miR159a.1	LOC_Os01g11430.1	3.5	expressed protein
osa-miR159a.1	LOC_Os01g59660.1	3.5	MYB family transcription factor, putative, expressed
osa-miR159a.1	LOC_Os01g59660.2	3.5	MYB family transcription factor, putative, expressed
osa-miR159a.1	LOC_Os01g59660.3	3.5	MYB family transcription factor, putative, expressed
osa-miR159a.1	LOC_Os01g59660.4	3.5	MYB family transcription factor, putative, expressed
osa-miR159a.1	LOC_Os06g40330.1	3.5	MYB family transcription factor, putative, expressed
osa-miR159a.1	LOC_Os10g05230.2	4	zinc finger, C3HC4 type domain containing protein, expressed
osa-miR159a.1	LOC_Os05g42240.1	3	hypothetical protein
osa-miR159a.1	LOC_Os09g36650.1	3.5	expressed protein
osa-miR159b	LOC_Os01g11430.1	3.5	expressed protein
osa-miR159b	LOC_Os01g59660.1	3.5	MYB family transcription factor, putative, expressed
osa-miR159b	LOC_Os01g59660.2	3.5	MYB family transcription factor, putative, expressed
osa-miR159b	LOC_Os01g59660.3	3.5	MYB family transcription factor, putative, expressed
osa-miR159b	LOC_Os01g59660.4	3.5	MYB family transcription factor, putative, expressed
osa-miR159b	LOC_Os06g40330.1	3.5	MYB family transcription factor, putative, expressed
osa-miR159b	LOC_Os10g05230.2	4	zinc finger, C3HC4 type domain containing protein, expressed
osa-miR159b	LOC_Os05g42240.1	3	hypothetical protein
osa-miR159b	LOC_Os09g36650.1	3.5	expressed protein
osa-miR159f	LOC_Os01g59660.1	2.5	MYB family transcription factor, putative, expressed
osa-miR159f	LOC_Os01g59660.2	2.5	MYB family transcription factor, putative, expressed
osa-miR159f	LOC_Os01g59660.3	2.5	MYB family transcription factor, putative, expressed
osa-miR159f	LOC_Os01g59660.4	2.5	MYB family transcription factor, putative, expressed
osa-miR159f	LOC_Os06g40330.1	3	MYB family transcription factor, putative, expressed
osa-miR159f	LOC_Os10g05230.2	3	zinc finger, C3HC4 type domain containing protein, expressed
osa-miR159f	LOC_Os09g36650.1	4.5	expressed protein
osa-miR160a	LOC_Os02g41800.1	1	auxin response factor, putative, expressed
osa-miR160a	LOC_Os02g41800.2	1	auxin response factor, putative, expressed
osa-miR160a	LOC_Os04g43910.1	1	auxin response factor, putative, expressed
osa-miR160a	LOC_Os04g59430.1	2	auxin response factor, putative, expressed
osa-miR160a	LOC_Os06g47150.1	1	auxin response factor 18, putative, expressed
osa-miR160a	LOC_Os06g47150.2	1	auxin response factor 18, putative, expressed
osa-miR160a	LOC_Os06g47150.3	1	auxin response factor 18, putative, expressed
osa-miR160a	LOC_Os06g47150.4	1	auxin response factor 18, putative, expressed
osa-miR160a	LOC_Os10g33940.1	1	auxin response factor 18, putative, expressed
osa-miR160b	LOC_Os02g41800.1	1	auxin response factor, putative, expressed
osa-miR160b	LOC_Os02g41800.2	1	auxin response factor, putative, expressed
osa-miR160b	LOC_Os04g43910.1	1	auxin response factor, putative, expressed
osa-miR160b	LOC_Os04g59430.1	2	auxin response factor, putative, expressed
osa-miR160b	LOC_Os06g47150.1	1	auxin response factor 18, putative, expressed
osa-miR160b	LOC_Os06g47150.2	1	auxin response factor 18, putative, expressed
osa-miR160b	LOC_Os06g47150.3	1	auxin response factor 18, putative, expressed
osa-miR160b	LOC_Os06g47150.4	1	auxin response factor 18, putative, expressed
osa-miR160b	LOC_Os10g33940.1	1	auxin response factor 18, putative, expressed
osa-miR160c	LOC_Os02g41800.1	1	auxin response factor, putative, expressed
osa-miR160c	LOC_Os02g41800.2	1	auxin response factor, putative, expressed
osa-miR160c	LOC_Os04g43910.1	1	auxin response factor, putative, expressed
osa-miR160c	LOC_Os04g59430.1	2	auxin response factor, putative, expressed
osa-miR160c	LOC_Os06g47150.1	1	auxin response factor 18, putative, expressed
osa-miR160c	LOC_Os06g47150.2	1	auxin response factor 18, putative, expressed
osa-miR160c	LOC_Os06g47150.3	1	auxin response factor 18, putative, expressed
osa-miR160c	LOC_Os06g47150.4	1	auxin response factor 18, putative, expressed
osa-miR160c	LOC_Os10g33940.1	1	auxin response factor 18, putative, expressed
osa-miR160d	LOC_Os02g41800.1	1	auxin response factor, putative, expressed
osa-miR160d	LOC_Os02g41800.2	1	auxin response factor, putative, expressed
osa-miR160d	LOC_Os04g43910.1	1	auxin response factor, putative, expressed
osa-miR160d	LOC_Os04g59430.1	2	auxin response factor, putative, expressed
osa-miR160d	LOC_Os06g47150.1	1	auxin response factor 18, putative, expressed
osa-miR160d	LOC_Os06g47150.2	1	auxin response factor 18, putative, expressed
osa-miR160d	LOC_Os06g47150.3	1	auxin response factor 18, putative, expressed
osa-miR160d	LOC_Os06g47150.4	1	auxin response factor 18, putative, expressed
osa-miR160d	LOC_Os10g33940.1	1	auxin response factor 18, putative, expressed
osa-miR160e	LOC_Os02g41800.1	1	auxin response factor, putative, expressed
osa-miR160e	LOC_Os02g41800.2	1	auxin response factor, putative, expressed
osa-miR160e	LOC_Os04g43910.1	1	auxin response factor, putative, expressed
osa-miR160e	LOC_Os04g59430.1	2.5	auxin response factor, putative, expressed
osa-miR160e	LOC_Os06g47150.1	1	auxin response factor 18, putative, expressed
osa-miR160e	LOC_Os06g47150.2	1	auxin response factor 18, putative, expressed
osa-miR160e	LOC_Os06g47150.3	1	auxin response factor 18, putative, expressed
osa-miR160e	LOC_Os06g47150.4	1	auxin response factor 18, putative, expressed
osa-miR160e	LOC_Os10g33940.1	1	auxin response factor 18, putative, expressed
osa-miR164e	LOC_Os02g36880.1	3	No apical meristem protein, putative, expressed
osa-miR164e	LOC_Os02g36880.2	3	No apical meristem protein, putative, expressed
osa-miR164e	LOC_Os02g36880.3	3	No apical meristem protein, putative, expressed
osa-miR164e	LOC_Os02g36880.4	3	No apical meristem protein, putative, expressed
osa-miR164e	LOC_Os04g38720.1	3	no apical meristem protein, putative, expressed
osa-miR164e	LOC_Os06g46270.1	3	no apical meristem protein, putative, expressed
osa-miR164e	LOC_Os12g05260.1	4	phytosulfokines precursor, putative, expressed
osa-miR164e	LOC_Os12g41680.1	3	No apical meristem protein, putative, expressed
osa-miR164e	LOC_Os01g60330.1	4.5	inactive receptor kinase At2g26730 precursor, putative, expressed
osa-miR164e	LOC_Os06g23650.1	3	no apical meristem protein, putative, expressed
osa-miR166a	LOC_Os04g48290.1	3	MATE efflux family protein, putative, expressed
osa-miR166a	LOC_Os01g08520.1	3.5	DUF581 domain containing protein, expressed
osa-miR166a	LOC_Os03g01890.1	3	START domain containing protein, expressed
osa-miR166a	LOC_Os03g01890.2	3	START domain containing protein, expressed
osa-miR166a	LOC_Os10g33960.1	3	START domain containing protein, expressed
osa-miR166a	LOC_Os10g33960.2	3	START domain containing protein, expressed
osa-miR166a	LOC_Os10g33960.3	3	START domain containing protein, expressed
osa-miR166a	LOC_Os10g33960.4	3	START domain containing protein, expressed
osa-miR166a	LOC_Os03g43930.1	3	START domain containing protein, expressed
osa-miR166a	LOC_Os03g43930.2	3	START domain containing protein, expressed
osa-miR166a	LOC_Os12g41860.1	3	START domain containing protein, expressed
osa-miR166b	LOC_Os04g48290.1	3	MATE efflux family protein, putative, expressed
osa-miR166b	LOC_Os01g08520.1	3.5	DUF581 domain containing protein, expressed
osa-miR166b	LOC_Os03g01890.1	3	START domain containing protein, expressed
osa-miR166b	LOC_Os03g01890.2	3	START domain containing protein, expressed
osa-miR166b	LOC_Os10g33960.1	3	START domain containing protein, expressed
osa-miR166b	LOC_Os10g33960.2	3	START domain containing protein, expressed
osa-miR166b	LOC_Os10g33960.3	3	START domain containing protein, expressed
osa-miR166b	LOC_Os10g33960.4	3	START domain containing protein, expressed
osa-miR166b	LOC_Os03g43930.1	3	START domain containing protein, expressed
osa-miR166b	LOC_Os03g43930.2	3	START domain containing protein, expressed
osa-miR166b	LOC_Os12g41860.1	3	START domain containing protein, expressed
osa-miR166c	LOC_Os04g48290.1	3	MATE efflux family protein, putative, expressed
osa-miR166c	LOC_Os01g08520.1	3.5	DUF581 domain containing protein, expressed
osa-miR166c	LOC_Os03g01890.1	3	START domain containing protein, expressed
osa-miR166c	LOC_Os03g01890.2	3	START domain containing protein, expressed
osa-miR166c	LOC_Os10g33960.1	3	START domain containing protein, expressed
osa-miR166c	LOC_Os10g33960.2	3	START domain containing protein, expressed
osa-miR166c	LOC_Os10g33960.3	3	START domain containing protein, expressed
osa-miR166c	LOC_Os10g33960.4	3	START domain containing protein, expressed
osa-miR166c	LOC_Os03g43930.1	3	START domain containing protein, expressed
osa-miR166c	LOC_Os03g43930.2	3	START domain containing protein, expressed
osa-miR166c	LOC_Os12g41860.1	3	START domain containing protein, expressed
osa-miR166d	LOC_Os04g48290.1	3	MATE efflux family protein, putative, expressed
osa-miR166d	LOC_Os01g08520.1	3.5	DUF581 domain containing protein, expressed
osa-miR166d	LOC_Os03g01890.1	3	START domain containing protein, expressed
osa-miR166d	LOC_Os03g01890.2	3	START domain containing protein, expressed
osa-miR166d	LOC_Os10g33960.1	3	START domain containing protein, expressed
osa-miR166d	LOC_Os10g33960.2	3	START domain containing protein, expressed
osa-miR166d	LOC_Os10g33960.3	3	START domain containing protein, expressed
osa-miR166d	LOC_Os10g33960.4	3	START domain containing protein, expressed
osa-miR166d	LOC_Os03g43930.1	3	START domain containing protein, expressed
osa-miR166d	LOC_Os03g43930.2	3	START domain containing protein, expressed
osa-miR166d	LOC_Os12g41860.1	3	START domain containing protein, expressed
osa-miR166e	LOC_Os02g49260.1	4.5	transporter-related, putative, expressed
osa-miR166f	LOC_Os04g48290.1	3	MATE efflux family protein, putative, expressed
osa-miR166f	LOC_Os01g08520.1	3.5	DUF581 domain containing protein, expressed
osa-miR166f	LOC_Os03g01890.1	3	START domain containing protein, expressed
osa-miR166f	LOC_Os03g01890.2	3	START domain containing protein, expressed
osa-miR166f	LOC_Os10g33960.1	3	START domain containing protein, expressed
osa-miR166f	LOC_Os10g33960.2	3	START domain containing protein, expressed
osa-miR166f	LOC_Os10g33960.3	3	START domain containing protein, expressed
osa-miR166f	LOC_Os10g33960.4	3	START domain containing protein, expressed
osa-miR166f	LOC_Os03g43930.1	3	START domain containing protein, expressed
osa-miR166f	LOC_Os03g43930.2	3	START domain containing protein, expressed
osa-miR166f	LOC_Os12g41860.1	3	START domain containing protein, expressed
osa-miR166i	LOC_Os04g48290.1	4.5	MATE efflux family protein, putative, expressed
osa-miR166i	LOC_Os03g01890.1	4	START domain containing protein, expressed
osa-miR166i	LOC_Os03g01890.2	4	START domain containing protein, expressed
osa-miR166i	LOC_Os10g33960.1	4	START domain containing protein, expressed
osa-miR166i	LOC_Os10g33960.2	4	START domain containing protein, expressed
osa-miR166i	LOC_Os10g33960.3	4	START domain containing protein, expressed
osa-miR166i	LOC_Os10g33960.4	4	START domain containing protein, expressed
osa-miR166i	LOC_Os03g43930.1	4	START domain containing protein, expressed
osa-miR166i	LOC_Os03g43930.2	4	START domain containing protein, expressed
osa-miR166i	LOC_Os12g41860.1	4	START domain containing protein, expressed
osa-miR166j	LOC_Os04g48290.1	4.5	MATE efflux family protein, putative, expressed
osa-miR166j	LOC_Os03g01890.1	4	START domain containing protein, expressed
osa-miR166j	LOC_Os03g01890.2	4	START domain containing protein, expressed
osa-miR166j	LOC_Os10g33960.1	4	START domain containing protein, expressed
osa-miR166j	LOC_Os10g33960.2	4	START domain containing protein, expressed
osa-miR166j	LOC_Os10g33960.3	4	START domain containing protein, expressed
osa-miR166j	LOC_Os10g33960.4	4	START domain containing protein, expressed
osa-miR166j	LOC_Os03g43930.1	4	START domain containing protein, expressed
osa-miR166j	LOC_Os03g43930.2	4	START domain containing protein, expressed
osa-miR166j	LOC_Os12g41860.1	4	START domain containing protein, expressed
osa-miR166m	LOC_Os04g48290.1	3.5	MATE efflux family protein, putative, expressed
osa-miR166m	LOC_Os01g08520.1	4	DUF581 domain containing protein, expressed
osa-miR166m	LOC_Os03g01890.1	3	START domain containing protein, expressed
osa-miR166m	LOC_Os03g01890.2	3	START domain containing protein, expressed
osa-miR166m	LOC_Os10g33960.1	3	START domain containing protein, expressed
osa-miR166m	LOC_Os10g33960.2	3	START domain containing protein, expressed
osa-miR166m	LOC_Os10g33960.3	3	START domain containing protein, expressed
osa-miR166m	LOC_Os10g33960.4	3	START domain containing protein, expressed
osa-miR166m	LOC_Os03g43930.1	3	START domain containing protein, expressed
osa-miR166m	LOC_Os03g43930.2	3	START domain containing protein, expressed
osa-miR166m	LOC_Os12g41860.1	3	START domain containing protein, expressed
osa-miR166n	LOC_Os04g48290.1	3	MATE efflux family protein, putative, expressed
osa-miR166n	LOC_Os01g08520.1	3.5	DUF581 domain containing protein, expressed
osa-miR166n	LOC_Os03g01890.1	3	START domain containing protein, expressed
osa-miR166n	LOC_Os03g01890.2	3	START domain containing protein, expressed
osa-miR166n	LOC_Os10g33960.1	3	START domain containing protein, expressed
osa-miR166n	LOC_Os10g33960.2	3	START domain containing protein, expressed
osa-miR166n	LOC_Os10g33960.3	3	START domain containing protein, expressed
osa-miR166n	LOC_Os10g33960.4	3	START domain containing protein, expressed
osa-miR166n	LOC_Os03g43930.1	3	START domain containing protein, expressed
osa-miR166n	LOC_Os03g43930.2	3	START domain containing protein, expressed
osa-miR166n	LOC_Os12g41860.1	3	START domain containing protein, expressed
osa-miR167d	LOC_Os04g57610.1	4.5	auxin response factor, putative, expressed
osa-miR167d	LOC_Os04g57610.3	4.5	auxin response factor, putative, expressed
osa-miR167d	LOC_Os02g47870.1	4	anaphase-promoting complex subunit 11, putative, expressed
osa-miR167d	LOC_Os07g33790.1	3.5	glutamate receptor 3.4 precursor, putative, expressed
osa-miR167d	LOC_Os01g43250.1	4.5	WD domain, G-beta repeat domain containing protein, expressed
osa-miR167d	LOC_Os07g29820.1	4.5	NBS-LRR disease resistance protein, putative, expressed
osa-miR167e	LOC_Os04g57610.1	4.5	auxin response factor, putative, expressed
osa-miR167e	LOC_Os04g57610.3	4.5	auxin response factor, putative, expressed
osa-miR167e	LOC_Os02g47870.1	4	anaphase-promoting complex subunit 11, putative, expressed
osa-miR167e	LOC_Os07g33790.1	3.5	glutamate receptor 3.4 precursor, putative, expressed
osa-miR167e	LOC_Os01g43250.1	4.5	WD domain, G-beta repeat domain containing protein, expressed
osa-miR167e	LOC_Os07g29820.1	4.5	NBS-LRR disease resistance protein, putative, expressed
osa-miR167f	LOC_Os04g57610.1	4.5	auxin response factor, putative, expressed
osa-miR167f	LOC_Os04g57610.3	4.5	auxin response factor, putative, expressed
osa-miR167f	LOC_Os02g47870.1	4	anaphase-promoting complex subunit 11, putative, expressed
osa-miR167f	LOC_Os07g33790.1	3.5	glutamate receptor 3.4 precursor, putative, expressed
osa-miR167f	LOC_Os01g43250.1	4.5	WD domain, G-beta repeat domain containing protein, expressed
osa-miR167f	LOC_Os07g29820.1	4.5	NBS-LRR disease resistance protein, putative, expressed
osa-miR167g	LOC_Os04g57610.1	4.5	auxin response factor, putative, expressed
osa-miR167g	LOC_Os04g57610.3	4.5	auxin response factor, putative, expressed
osa-miR167g	LOC_Os02g47870.1	4	anaphase-promoting complex subunit 11, putative, expressed
osa-miR167g	LOC_Os07g33790.1	3.5	glutamate receptor 3.4 precursor, putative, expressed
osa-miR167g	LOC_Os01g43250.1	4.5	WD domain, G-beta repeat domain containing protein, expressed
osa-miR167g	LOC_Os07g29820.1	4.5	NBS-LRR disease resistance protein, putative, expressed
osa-miR167h	LOC_Os04g57610.1	4.5	auxin response factor, putative, expressed
osa-miR167h	LOC_Os04g57610.3	4.5	auxin response factor, putative, expressed
osa-miR167h	LOC_Os02g47870.1	4	anaphase-promoting complex subunit 11, putative, expressed
osa-miR167h	LOC_Os07g33790.1	3.5	glutamate receptor 3.4 precursor, putative, expressed
osa-miR167h	LOC_Os01g43250.1	4.5	WD domain, G-beta repeat domain containing protein, expressed
osa-miR167h	LOC_Os07g29820.1	4.5	NBS-LRR disease resistance protein, putative, expressed
osa-miR167i	LOC_Os04g57610.1	4.5	auxin response factor, putative, expressed
osa-miR167i	LOC_Os04g57610.3	4.5	auxin response factor, putative, expressed
osa-miR167i	LOC_Os02g47870.1	4	anaphase-promoting complex subunit 11, putative, expressed
osa-miR167i	LOC_Os07g33790.1	3.5	glutamate receptor 3.4 precursor, putative, expressed
osa-miR167i	LOC_Os01g43250.1	4.5	WD domain, G-beta repeat domain containing protein, expressed
osa-miR167i	LOC_Os07g29820.1	4.5	NBS-LRR disease resistance protein, putative, expressed
osa-miR167j	LOC_Os04g57610.1	4.5	auxin response factor, putative, expressed
osa-miR167j	LOC_Os04g57610.3	4.5	auxin response factor, putative, expressed
osa-miR167j	LOC_Os02g47870.1	4	anaphase-promoting complex subunit 11, putative, expressed
osa-miR167j	LOC_Os07g33790.1	3.5	glutamate receptor 3.4 precursor, putative, expressed
osa-miR167j	LOC_Os01g43250.1	4.5	WD domain, G-beta repeat domain containing protein, expressed
osa-miR167j	LOC_Os07g29820.1	4.5	NBS-LRR disease resistance protein, putative, expressed
osa-miR168a	LOC_Os09g02700.1	4	polyadenylate-binding protein, putative, expressed
osa-miR168a	LOC_Os10g08022.1	4.5	fructose-bisphospate aldolase isozyme, putative, expressed
osa-miR169a	LOC_Os02g53620.1	3	nuclear transcription factor Y subunit, putative, expressed
osa-miR169a	LOC_Os03g07880.1	3.5	nuclear transcription factor Y subunit, putative, expressed
osa-miR169a	LOC_Os03g07880.2	3.5	nuclear transcription factor Y subunit, putative, expressed
osa-miR169a	LOC_Os03g07880.3	3.5	nuclear transcription factor Y subunit, putative, expressed
osa-miR169a	LOC_Os03g29760.1	3.5	nuclear transcription factor Y subunit, putative, expressed
osa-miR169a	LOC_Os03g29760.2	3.5	nuclear transcription factor Y subunit, putative, expressed
osa-miR169a	LOC_Os03g29760.3	3.5	nuclear transcription factor Y subunit, putative, expressed
osa-miR169a	LOC_Os03g48970.1	4	nuclear transcription factor Y subunit, putative, expressed
osa-miR169a	LOC_Os03g48970.2	4	nuclear transcription factor Y subunit, putative, expressed
osa-miR169a	LOC_Os03g48970.3	4	nuclear transcription factor Y subunit, putative, expressed
osa-miR169a	LOC_Os03g48970.4	4	nuclear transcription factor Y subunit, putative, expressed
osa-miR169a	LOC_Os07g06470.1	2.5	nuclear transcription factor Y subunit, putative, expressed
osa-miR169a	LOC_Os07g06470.2	2.5	nuclear transcription factor Y subunit, putative, expressed
osa-miR169a	LOC_Os07g41720.1	3.5	nuclear transcription factor Y subunit, putative, expressed
osa-miR169a	LOC_Os07g41720.2	3.5	nuclear transcription factor Y subunit, putative, expressed
osa-miR169a	LOC_Os12g42400.1	3	nuclear transcription factor Y subunit, putative, expressed
osa-miR169a	LOC_Os12g42400.2	3	nuclear transcription factor Y subunit, putative, expressed
osa-miR169a	LOC_Os12g42400.3	3	nuclear transcription factor Y subunit, putative, expressed
osa-miR169a	LOC_Os03g44540.1	4	nuclear transcription factor Y subunit, putative, expressed
osa-miR169e	LOC_Os02g53620.1	3.5	nuclear transcription factor Y subunit, putative, expressed
osa-miR169e	LOC_Os03g07880.1	3.5	nuclear transcription factor Y subunit, putative, expressed
osa-miR169e	LOC_Os03g07880.2	3.5	nuclear transcription factor Y subunit, putative, expressed
osa-miR169e	LOC_Os03g07880.3	3.5	nuclear transcription factor Y subunit, putative, expressed
osa-miR169e	LOC_Os03g29760.1	3.5	nuclear transcription factor Y subunit, putative, expressed
osa-miR169e	LOC_Os03g29760.2	3.5	nuclear transcription factor Y subunit, putative, expressed
osa-miR169e	LOC_Os03g29760.3	3.5	nuclear transcription factor Y subunit, putative, expressed
osa-miR169e	LOC_Os03g48970.1	4	nuclear transcription factor Y subunit, putative, expressed
osa-miR169e	LOC_Os03g48970.2	4	nuclear transcription factor Y subunit, putative, expressed
osa-miR169e	LOC_Os03g48970.3	4	nuclear transcription factor Y subunit, putative, expressed
osa-miR169e	LOC_Os03g48970.4	4	nuclear transcription factor Y subunit, putative, expressed
osa-miR169e	LOC_Os07g06470.1	3	nuclear transcription factor Y subunit, putative, expressed
osa-miR169e	LOC_Os07g06470.2	3	nuclear transcription factor Y subunit, putative, expressed
osa-miR169e	LOC_Os07g41720.1	3.5	nuclear transcription factor Y subunit, putative, expressed
osa-miR169e	LOC_Os07g41720.2	3.5	nuclear transcription factor Y subunit, putative, expressed
osa-miR169e	LOC_Os12g42400.1	4	nuclear transcription factor Y subunit, putative, expressed
osa-miR169e	LOC_Os12g42400.2	4	nuclear transcription factor Y subunit, putative, expressed
osa-miR169e	LOC_Os12g42400.3	4	nuclear transcription factor Y subunit, putative, expressed
osa-miR169e	LOC_Os03g44540.1	4.5	nuclear transcription factor Y subunit, putative, expressed
osa-miR169h	LOC_Os02g53620.1	2.5	nuclear transcription factor Y subunit, putative, expressed
osa-miR169h	LOC_Os03g07880.1	3	nuclear transcription factor Y subunit, putative, expressed
osa-miR169h	LOC_Os03g07880.2	3	nuclear transcription factor Y subunit, putative, expressed
osa-miR169h	LOC_Os03g07880.3	3	nuclear transcription factor Y subunit, putative, expressed
osa-miR169h	LOC_Os03g29760.1	4	nuclear transcription factor Y subunit, putative, expressed
osa-miR169h	LOC_Os03g29760.2	4	nuclear transcription factor Y subunit, putative, expressed
osa-miR169h	LOC_Os03g29760.3	4	nuclear transcription factor Y subunit, putative, expressed
osa-miR169h	LOC_Os03g48970.1	3	nuclear transcription factor Y subunit, putative, expressed
osa-miR169h	LOC_Os03g48970.2	3	nuclear transcription factor Y subunit, putative, expressed
osa-miR169h	LOC_Os03g48970.3	3	nuclear transcription factor Y subunit, putative, expressed
osa-miR169h	LOC_Os03g48970.4	3	nuclear transcription factor Y subunit, putative, expressed
osa-miR169h	LOC_Os07g06470.1	3.5	nuclear transcription factor Y subunit, putative, expressed
osa-miR169h	LOC_Os07g06470.2	3.5	nuclear transcription factor Y subunit, putative, expressed
osa-miR169h	LOC_Os07g41720.1	4	nuclear transcription factor Y subunit, putative, expressed
osa-miR169h	LOC_Os07g41720.2	4	nuclear transcription factor Y subunit, putative, expressed
osa-miR169h	LOC_Os12g42400.1	3	nuclear transcription factor Y subunit, putative, expressed
osa-miR169h	LOC_Os12g42400.2	3	nuclear transcription factor Y subunit, putative, expressed
osa-miR169h	LOC_Os12g42400.3	3	nuclear transcription factor Y subunit, putative, expressed
osa-miR169h	LOC_Os03g44540.1	3.5	nuclear transcription factor Y subunit, putative, expressed
osa-miR169i	LOC_Os02g53620.1	2.5	nuclear transcription factor Y subunit, putative, expressed
osa-miR169i	LOC_Os03g07880.1	3	nuclear transcription factor Y subunit, putative, expressed
osa-miR169i	LOC_Os03g07880.2	3	nuclear transcription factor Y subunit, putative, expressed
osa-miR169i	LOC_Os03g07880.3	3	nuclear transcription factor Y subunit, putative, expressed
osa-miR169i	LOC_Os03g29760.1	4	nuclear transcription factor Y subunit, putative, expressed
osa-miR169i	LOC_Os03g29760.2	4	nuclear transcription factor Y subunit, putative, expressed
osa-miR169i	LOC_Os03g29760.3	4	nuclear transcription factor Y subunit, putative, expressed
osa-miR169i	LOC_Os03g48970.1	3	nuclear transcription factor Y subunit, putative, expressed
osa-miR169i	LOC_Os03g48970.2	3	nuclear transcription factor Y subunit, putative, expressed
osa-miR169i	LOC_Os03g48970.3	3	nuclear transcription factor Y subunit, putative, expressed
osa-miR169i	LOC_Os03g48970.4	3	nuclear transcription factor Y subunit, putative, expressed
osa-miR169i	LOC_Os07g06470.1	3.5	nuclear transcription factor Y subunit, putative, expressed
osa-miR169i	LOC_Os07g06470.2	3.5	nuclear transcription factor Y subunit, putative, expressed
osa-miR169i	LOC_Os07g41720.1	4	nuclear transcription factor Y subunit, putative, expressed
osa-miR169i	LOC_Os07g41720.2	4	nuclear transcription factor Y subunit, putative, expressed
osa-miR169i	LOC_Os12g42400.1	3	nuclear transcription factor Y subunit, putative, expressed
osa-miR169i	LOC_Os12g42400.2	3	nuclear transcription factor Y subunit, putative, expressed
osa-miR169i	LOC_Os12g42400.3	3	nuclear transcription factor Y subunit, putative, expressed
osa-miR169i	LOC_Os03g44540.1	3.5	nuclear transcription factor Y subunit, putative, expressed
osa-miR169j	LOC_Os02g53620.1	2.5	nuclear transcription factor Y subunit, putative, expressed
osa-miR169j	LOC_Os03g07880.1	3	nuclear transcription factor Y subunit, putative, expressed
osa-miR169j	LOC_Os03g07880.2	3	nuclear transcription factor Y subunit, putative, expressed
osa-miR169j	LOC_Os03g07880.3	3	nuclear transcription factor Y subunit, putative, expressed
osa-miR169j	LOC_Os03g29760.1	4	nuclear transcription factor Y subunit, putative, expressed
osa-miR169j	LOC_Os03g29760.2	4	nuclear transcription factor Y subunit, putative, expressed
osa-miR169j	LOC_Os03g29760.3	4	nuclear transcription factor Y subunit, putative, expressed
osa-miR169j	LOC_Os03g48970.1	3	nuclear transcription factor Y subunit, putative, expressed
osa-miR169j	LOC_Os03g48970.2	3	nuclear transcription factor Y subunit, putative, expressed
osa-miR169j	LOC_Os03g48970.3	3	nuclear transcription factor Y subunit, putative, expressed
osa-miR169j	LOC_Os03g48970.4	3	nuclear transcription factor Y subunit, putative, expressed
osa-miR169j	LOC_Os07g06470.1	3.5	nuclear transcription factor Y subunit, putative, expressed
osa-miR169j	LOC_Os07g06470.2	3.5	nuclear transcription factor Y subunit, putative, expressed
osa-miR169j	LOC_Os07g41720.1	4	nuclear transcription factor Y subunit, putative, expressed
osa-miR169j	LOC_Os07g41720.2	4	nuclear transcription factor Y subunit, putative, expressed
osa-miR169j	LOC_Os12g42400.1	3	nuclear transcription factor Y subunit, putative, expressed
osa-miR169j	LOC_Os12g42400.2	3	nuclear transcription factor Y subunit, putative, expressed
osa-miR169j	LOC_Os12g42400.3	3	nuclear transcription factor Y subunit, putative, expressed
osa-miR169j	LOC_Os03g44540.1	3.5	nuclear transcription factor Y subunit, putative, expressed
osa-miR169k	LOC_Os02g53620.1	2.5	nuclear transcription factor Y subunit, putative, expressed
osa-miR169k	LOC_Os03g07880.1	3	nuclear transcription factor Y subunit, putative, expressed
osa-miR169k	LOC_Os03g07880.2	3	nuclear transcription factor Y subunit, putative, expressed
osa-miR169k	LOC_Os03g07880.3	3	nuclear transcription factor Y subunit, putative, expressed
osa-miR169k	LOC_Os03g29760.1	4	nuclear transcription factor Y subunit, putative, expressed
osa-miR169k	LOC_Os03g29760.2	4	nuclear transcription factor Y subunit, putative, expressed
osa-miR169k	LOC_Os03g29760.3	4	nuclear transcription factor Y subunit, putative, expressed
osa-miR169k	LOC_Os03g48970.1	3	nuclear transcription factor Y subunit, putative, expressed
osa-miR169k	LOC_Os03g48970.2	3	nuclear transcription factor Y subunit, putative, expressed
osa-miR169k	LOC_Os03g48970.3	3	nuclear transcription factor Y subunit, putative, expressed
osa-miR169k	LOC_Os03g48970.4	3	nuclear transcription factor Y subunit, putative, expressed
osa-miR169k	LOC_Os07g06470.1	3.5	nuclear transcription factor Y subunit, putative, expressed
osa-miR169k	LOC_Os07g06470.2	3.5	nuclear transcription factor Y subunit, putative, expressed
osa-miR169k	LOC_Os07g41720.1	4	nuclear transcription factor Y subunit, putative, expressed
osa-miR169k	LOC_Os07g41720.2	4	nuclear transcription factor Y subunit, putative, expressed
osa-miR169k	LOC_Os12g42400.1	3	nuclear transcription factor Y subunit, putative, expressed
osa-miR169k	LOC_Os12g42400.2	3	nuclear transcription factor Y subunit, putative, expressed
osa-miR169k	LOC_Os12g42400.3	3	nuclear transcription factor Y subunit, putative, expressed
osa-miR169k	LOC_Os03g44540.1	3.5	nuclear transcription factor Y subunit, putative, expressed
osa-miR169l	LOC_Os02g53620.1	2.5	nuclear transcription factor Y subunit, putative, expressed
osa-miR169l	LOC_Os03g07880.1	3	nuclear transcription factor Y subunit, putative, expressed
osa-miR169l	LOC_Os03g07880.2	3	nuclear transcription factor Y subunit, putative, expressed
osa-miR169l	LOC_Os03g07880.3	3	nuclear transcription factor Y subunit, putative, expressed
osa-miR169l	LOC_Os03g29760.1	4	nuclear transcription factor Y subunit, putative, expressed
osa-miR169l	LOC_Os03g29760.2	4	nuclear transcription factor Y subunit, putative, expressed
osa-miR169l	LOC_Os03g29760.3	4	nuclear transcription factor Y subunit, putative, expressed
osa-miR169l	LOC_Os03g48970.1	3	nuclear transcription factor Y subunit, putative, expressed
osa-miR169l	LOC_Os03g48970.2	3	nuclear transcription factor Y subunit, putative, expressed
osa-miR169l	LOC_Os03g48970.3	3	nuclear transcription factor Y subunit, putative, expressed
osa-miR169l	LOC_Os03g48970.4	3	nuclear transcription factor Y subunit, putative, expressed
osa-miR169l	LOC_Os07g06470.1	3.5	nuclear transcription factor Y subunit, putative, expressed
osa-miR169l	LOC_Os07g06470.2	3.5	nuclear transcription factor Y subunit, putative, expressed
osa-miR169l	LOC_Os07g41720.1	4	nuclear transcription factor Y subunit, putative, expressed
osa-miR169l	LOC_Os07g41720.2	4	nuclear transcription factor Y subunit, putative, expressed
osa-miR169l	LOC_Os12g42400.1	3	nuclear transcription factor Y subunit, putative, expressed
osa-miR169l	LOC_Os12g42400.2	3	nuclear transcription factor Y subunit, putative, expressed
osa-miR169l	LOC_Os12g42400.3	3	nuclear transcription factor Y subunit, putative, expressed
osa-miR169l	LOC_Os03g44540.1	3.5	nuclear transcription factor Y subunit, putative, expressed
osa-miR169m	LOC_Os02g53620.1	2.5	nuclear transcription factor Y subunit, putative, expressed
osa-miR169m	LOC_Os03g07880.1	3	nuclear transcription factor Y subunit, putative, expressed
osa-miR169m	LOC_Os03g07880.2	3	nuclear transcription factor Y subunit, putative, expressed
osa-miR169m	LOC_Os03g07880.3	3	nuclear transcription factor Y subunit, putative, expressed
osa-miR169m	LOC_Os03g29760.1	4	nuclear transcription factor Y subunit, putative, expressed
osa-miR169m	LOC_Os03g29760.2	4	nuclear transcription factor Y subunit, putative, expressed
osa-miR169m	LOC_Os03g29760.3	4	nuclear transcription factor Y subunit, putative, expressed
osa-miR169m	LOC_Os03g48970.1	3	nuclear transcription factor Y subunit, putative, expressed
osa-miR169m	LOC_Os03g48970.2	3	nuclear transcription factor Y subunit, putative, expressed
osa-miR169m	LOC_Os03g48970.3	3	nuclear transcription factor Y subunit, putative, expressed
osa-miR169m	LOC_Os03g48970.4	3	nuclear transcription factor Y subunit, putative, expressed
osa-miR169m	LOC_Os07g06470.1	3.5	nuclear transcription factor Y subunit, putative, expressed
osa-miR169m	LOC_Os07g06470.2	3.5	nuclear transcription factor Y subunit, putative, expressed
osa-miR169m	LOC_Os07g41720.1	4	nuclear transcription factor Y subunit, putative, expressed
osa-miR169m	LOC_Os07g41720.2	4	nuclear transcription factor Y subunit, putative, expressed
osa-miR169m	LOC_Os12g42400.1	3	nuclear transcription factor Y subunit, putative, expressed
osa-miR169m	LOC_Os12g42400.2	3	nuclear transcription factor Y subunit, putative, expressed
osa-miR169m	LOC_Os12g42400.3	3	nuclear transcription factor Y subunit, putative, expressed
osa-miR169m	LOC_Os03g44540.1	3.5	nuclear transcription factor Y subunit, putative, expressed
osa-miR169n	LOC_Os02g53620.1	4	nuclear transcription factor Y subunit, putative, expressed
osa-miR169n	LOC_Os03g48970.1	3	nuclear transcription factor Y subunit, putative, expressed
osa-miR169n	LOC_Os03g48970.2	3	nuclear transcription factor Y subunit, putative, expressed
osa-miR169n	LOC_Os03g48970.3	3	nuclear transcription factor Y subunit, putative, expressed
osa-miR169n	LOC_Os03g48970.4	3	nuclear transcription factor Y subunit, putative, expressed
osa-miR169n	LOC_Os12g42400.1	1.5	nuclear transcription factor Y subunit, putative, expressed
osa-miR169n	LOC_Os12g42400.2	1.5	nuclear transcription factor Y subunit, putative, expressed
osa-miR169n	LOC_Os12g42400.3	1.5	nuclear transcription factor Y subunit, putative, expressed
osa-miR169n	LOC_Os03g44540.1	2	nuclear transcription factor Y subunit, putative, expressed
osa-miR169o	LOC_Os02g53620.1	4	nuclear transcription factor Y subunit, putative, expressed
osa-miR169o	LOC_Os03g48970.1	3	nuclear transcription factor Y subunit, putative, expressed
osa-miR169o	LOC_Os03g48970.2	3	nuclear transcription factor Y subunit, putative, expressed
osa-miR169o	LOC_Os03g48970.3	3	nuclear transcription factor Y subunit, putative, expressed
osa-miR169o	LOC_Os03g48970.4	3	nuclear transcription factor Y subunit, putative, expressed
osa-miR169o	LOC_Os12g42400.1	1.5	nuclear transcription factor Y subunit, putative, expressed
osa-miR169o	LOC_Os12g42400.2	1.5	nuclear transcription factor Y subunit, putative, expressed
osa-miR169o	LOC_Os12g42400.3	1.5	nuclear transcription factor Y subunit, putative, expressed
osa-miR169o	LOC_Os03g44540.1	2	nuclear transcription factor Y subunit, putative, expressed
osa-miR1846e	LOC_Os04g39060.1	4.5	CRS1/YhbY domain containing protein, expressed
osa-miR1846e	LOC_Os04g39060.2	4.5	CRS1/YhbY domain containing protein, expressed
osa-miR1847.1	LOC_Os05g35720.1	3.5	transmembrane protein 18, putative, expressed
osa-miR1848	LOC_Os02g45930.1	4	expressed protein
osa-miR1848	LOC_Os05g38630.1	4.5	ras-related protein, putative, expressed
osa-miR1848	LOC_Os05g38630.2	4.5	ras-related protein, putative, expressed
osa-miR1850.1	LOC_Os04g47410.5	2	DHHC zinc finger domain containing protein, expressed
osa-miR1850.1	LOC_Os06g51410.1	4	OsPOP15 - Putative Prolyl Oligopeptidase homologue, expressed
osa-miR1850.1	LOC_Os11g04180.1	4.5	dual specificity protein phosphatase, putative, expressed
osa-miR1850.1	LOC_Os12g03990.1	4.5	dual specificity protein phosphatase, putative, expressed
osa-miR1854-5p	LOC_Os05g05810.1	4	DEAD-box ATP-dependent RNA helicase, putative, expressed
osa-miR1854-5p	LOC_Os05g05810.2	4	DEAD-box ATP-dependent RNA helicase, putative, expressed
osa-miR1854-5p	LOC_Os06g43790.1	4.5	transcription initiation factor TFIID subunit 1, putative, expressed
osa-miR1854-5p	LOC_Os10g32400.1	4.5	PsbP, putative, expressed
osa-miR1854-5p	LOC_Os10g32400.2	4.5	PsbP, putative, expressed
osa-miR1858a	LOC_Os03g56060.1	3	CSLC9 - cellulose synthase-like family C, expressed
osa-miR1858a	LOC_Os04g59050.1	4	hypothetical protein
osa-miR1858a	LOC_Os07g27810.1	4.5	fiber protein Fb34, putative, expressed
osa-miR1858b	LOC_Os03g56060.1	3	CSLC9 - cellulose synthase-like family C, expressed
osa-miR1858b	LOC_Os04g59050.1	4	hypothetical protein
osa-miR1858b	LOC_Os07g27810.1	4.5	fiber protein Fb34, putative, expressed
osa-miR1861g	LOC_Os05g14940.1	4.5	transposon protein, putative, unclassified, expressed
osa-miR1864	LOC_Os01g14020.1	4	expressed protein
osa-miR1864	LOC_Os01g14020.2	4	expressed protein
osa-miR2055	LOC_Os02g01180.1	4.5	kinesin motor domain containing protein, putative, expressed
osa-miR2055	LOC_Os02g01180.2	4.5	kinesin motor domain containing protein, putative, expressed
osa-miR2055	LOC_Os04g54330.1	4	acetyltransferase, GNAT family, putative, expressed
osa-miR2055	LOC_Os04g54330.3	4	acetyltransferase, GNAT family, putative, expressed
osa-miR2091-5p	LOC_Os03g07850.1	4	tRNA methyltransferase, putative, expressed
osa-miR2091-5p	LOC_Os03g08430.1	4.5	SAC domain containing protein, putative, expressed
osa-miR2091-5p	LOC_Os03g08430.2	4.5	SAC domain containing protein, putative, expressed
osa-miR2091-5p	LOC_Os09g36600.1	4.5	nodulin, putative, expressed
osa-miR2091-5p	LOC_Os09g36600.2	4.5	nodulin, putative, expressed
osa-miR2093-5p	LOC_Os11g34790.1	4.5	expressed protein
osa-miR2094-3p	LOC_Os01g65460.1	4.5	beta-galactosidase precursor, putative, expressed
osa-miR2094-3p	LOC_Os01g65460.2	4.5	beta-galactosidase precursor, putative, expressed
osa-miR2094-3p	LOC_Os11g34270.1	4.5	ubiquitin carboxyl-terminal hydrolase domain containing protein, expressed
osa-miR2095-5p	LOC_Os02g56360.1	4.5	expressed protein
osa-miR2095-5p	LOC_Os02g56360.3	4.5	expressed protein
osa-miR2095-5p	LOC_Os06g41750.1	4	tetratricopeptide repeat domain containing protein, expressed
osa-miR2095-5p	LOC_Os08g37270.1	4.5	heat shock protein DnaJ, putative, expressed
osa-miR2099-3p	LOC_Os04g57300.1	4	phosphatidylinositol 3- and 4-kinase family protein, putative, expressed
osa-miR2099-3p	LOC_Os04g57300.2	4	phosphatidylinositol 3- and 4-kinase family protein, putative, expressed
osa-miR2099-3p	LOC_Os11g28300.1	4.5	uncharacterized protein family UPF0016 domain containing protein, expressed
osa-miR2099-3p	LOC_Os12g12880.1	4	expressed protein
osa-miR2099-3p	LOC_Os01g68830.1	4.5	expressed protein
osa-miR2101-3p	LOC_Os01g04650.1	4.5	PB1 domain containing protein, expressed
osa-miR2101-3p	LOC_Os05g13950.1	4.5	eukaryotic translation initiation factor 3 subunit E-interacting protein, putative, expressed
osa-miR2101-3p	LOC_Os05g13950.2	4.5	eukaryotic translation initiation factor 3 subunit E-interacting protein, putative, expressed
osa-miR2878-3p	LOC_Os01g04720.1	4	leucine-rich repeat protein-related, putative, expressed
osa-miR2878-3p	LOC_Os01g04720.2	4	leucine-rich repeat protein-related, putative, expressed
osa-miR390	LOC_Os02g10100.1	2	leucine-rich repeat receptor protein kinase EXS precursor, putative, expressed
osa-miR390	LOC_Os06g03970.1	4	receptor-like protein kinase 5 precursor, putative, expressed
osa-miR393b	LOC_Os04g32460.1	3	OsFBL16 - F-box domain and LRR containing protein, expressed
osa-miR393b	LOC_Os04g32460.2	3	OsFBL16 - F-box domain and LRR containing protein, expressed
osa-miR393b	LOC_Os05g05800.1	1	OsFBL21 - F-box domain and LRR containing protein, expressed
osa-miR394	LOC_Os01g69940.1	0	OsFBX32 - F-box domain containing protein, expressed
osa-miR394	LOC_Os07g38460.1	4.5	expressed protein
osa-miR394	LOC_Os06g15690.1	4.5	no apical meristem protein, putative, expressed
osa-miR394	LOC_Os05g51150.1	3	RNA polymerase sigma factor, putative, expressed
osa-miR394	LOC_Os05g51150.3	3	RNA polymerase sigma factor, putative, expressed
osa-miR396c	LOC_Os01g44230.1	4.5	transcription factor X1, putative, expressed
osa-miR396c	LOC_Os02g47280.1	4	growth-regulating factor, putative, expressed
osa-miR396c	LOC_Os02g47280.2	4	growth-regulating factor, putative, expressed
osa-miR396c	LOC_Os03g17860.1	4.5	OsPDIL5-1 protein disulfide isomerase PDIL5-1, expressed
osa-miR396c	LOC_Os11g35030.1	4	growth regulating factor protein, putative, expressed
osa-miR396c	LOC_Os11g35030.2	4	growth regulating factor protein, putative, expressed
osa-miR396c	LOC_Os02g45570.1	4	growth regulating factor protein, putative, expressed
osa-miR396c	LOC_Os02g45570.2	4	growth regulating factor protein, putative, expressed
osa-miR396c	LOC_Os02g53690.1	4	growth regulating factor protein, putative, expressed
osa-miR396c	LOC_Os03g47140.1	4	growth regulating factor protein, putative, expressed
osa-miR396c	LOC_Os03g51970.1	4	growth-regulating factor, putative, expressed
osa-miR396c	LOC_Os04g51190.1	4	growth-regulating factor, putative, expressed
osa-miR396c	LOC_Os04g51190.2	4	growth-regulating factor, putative, expressed
osa-miR396c	LOC_Os04g51190.3	4	growth-regulating factor, putative, expressed
osa-miR396c	LOC_Os06g10310.1	4	growth regulating factor protein, putative, expressed
osa-miR396c	LOC_Os12g29980.1	4	growth regulating factor protein, putative, expressed
osa-miR396c	LOC_Os12g29980.2	4	growth regulating factor protein, putative, expressed
osa-miR396d	LOC_Os06g02560.1	1	growth-regulating factor, putative, expressed
osa-miR396d	LOC_Os06g02560.2	1	growth-regulating factor, putative, expressed
osa-miR396d	LOC_Os06g02560.3	1	growth-regulating factor, putative, expressed
osa-miR396d	LOC_Os02g47280.1	1	growth-regulating factor, putative, expressed
osa-miR396d	LOC_Os02g47280.2	1	growth-regulating factor, putative, expressed
osa-miR396d	LOC_Os11g35030.1	3.5	growth regulating factor protein, putative, expressed
osa-miR396d	LOC_Os11g35030.2	3.5	growth regulating factor protein, putative, expressed
osa-miR396d	LOC_Os02g45570.1	1	growth regulating factor protein, putative, expressed
osa-miR396d	LOC_Os02g45570.2	1	growth regulating factor protein, putative, expressed
osa-miR396d	LOC_Os02g53690.1	1	growth regulating factor protein, putative, expressed
osa-miR396d	LOC_Os03g47140.1	1	growth regulating factor protein, putative, expressed
osa-miR396d	LOC_Os03g51970.1	3	growth-regulating factor, putative, expressed
osa-miR396d	LOC_Os04g48510.1	3	growth regulating factor protein, putative, expressed
osa-miR396d	LOC_Os04g51190.1	1	growth-regulating factor, putative, expressed
osa-miR396d	LOC_Os04g51190.2	1	growth-regulating factor, putative, expressed
osa-miR396d	LOC_Os04g51190.3	1	growth-regulating factor, putative, expressed
osa-miR396d	LOC_Os06g10310.1	1	growth regulating factor protein, putative, expressed
osa-miR396d	LOC_Os07g41140.1	4	receptor-like protein kinase precursor, putative, expressed
osa-miR396d	LOC_Os12g29980.1	3	growth regulating factor protein, putative, expressed
osa-miR396d	LOC_Os12g29980.2	3	growth regulating factor protein, putative, expressed
osa-miR396e	LOC_Os06g02560.1	1	growth-regulating factor, putative, expressed
osa-miR396e	LOC_Os06g02560.2	1	growth-regulating factor, putative, expressed
osa-miR396e	LOC_Os06g02560.3	1	growth-regulating factor, putative, expressed
osa-miR396e	LOC_Os02g47280.1	1	growth-regulating factor, putative, expressed
osa-miR396e	LOC_Os02g47280.2	1	growth-regulating factor, putative, expressed
osa-miR396e	LOC_Os11g35030.1	3.5	growth regulating factor protein, putative, expressed
osa-miR396e	LOC_Os11g35030.2	3.5	growth regulating factor protein, putative, expressed
osa-miR396e	LOC_Os02g45570.1	1	growth regulating factor protein, putative, expressed
osa-miR396e	LOC_Os02g45570.2	1	growth regulating factor protein, putative, expressed
osa-miR396e	LOC_Os02g53690.1	1	growth regulating factor protein, putative, expressed
osa-miR396e	LOC_Os03g47140.1	1	growth regulating factor protein, putative, expressed
osa-miR396e	LOC_Os03g51970.1	3	growth-regulating factor, putative, expressed
osa-miR396e	LOC_Os04g48510.1	3	growth regulating factor protein, putative, expressed
osa-miR396e	LOC_Os04g51190.1	1	growth-regulating factor, putative, expressed
osa-miR396e	LOC_Os04g51190.2	1	growth-regulating factor, putative, expressed
osa-miR396e	LOC_Os04g51190.3	1	growth-regulating factor, putative, expressed
osa-miR396e	LOC_Os06g10310.1	1	growth regulating factor protein, putative, expressed
osa-miR396e	LOC_Os07g41140.1	4	receptor-like protein kinase precursor, putative, expressed
osa-miR396e	LOC_Os12g29980.1	3	growth regulating factor protein, putative, expressed
osa-miR396e	LOC_Os12g29980.2	3	growth regulating factor protein, putative, expressed
osa-miR396g	LOC_Os02g28540.1	4	retrotransposon protein, putative, Ty3-gypsy subclass
osa-miR396g	LOC_Os06g02560.1	0	growth-regulating factor, putative, expressed
osa-miR396g	LOC_Os06g02560.2	0	growth-regulating factor, putative, expressed
osa-miR396g	LOC_Os06g02560.3	0	growth-regulating factor, putative, expressed
osa-miR396g	LOC_Os08g37980.1	4.5	retrotransposon protein, putative, Ty3-gypsy subclass
osa-miR396g	LOC_Os02g47280.1	0	growth-regulating factor, putative, expressed
osa-miR396g	LOC_Os02g47280.2	0	growth-regulating factor, putative, expressed
osa-miR396g	LOC_Os11g35030.1	2.5	growth regulating factor protein, putative, expressed
osa-miR396g	LOC_Os11g35030.2	2.5	growth regulating factor protein, putative, expressed
osa-miR396g	LOC_Os02g45570.1	0	growth regulating factor protein, putative, expressed
osa-miR396g	LOC_Os02g45570.2	0	growth regulating factor protein, putative, expressed
osa-miR396g	LOC_Os02g53690.1	0	growth regulating factor protein, putative, expressed
osa-miR396g	LOC_Os03g47140.1	0	growth regulating factor protein, putative, expressed
osa-miR396g	LOC_Os03g51970.1	2	growth-regulating factor, putative, expressed
osa-miR396g	LOC_Os04g48510.1	2	growth regulating factor protein, putative, expressed
osa-miR396g	LOC_Os04g51190.1	0	growth-regulating factor, putative, expressed
osa-miR396g	LOC_Os04g51190.2	0	growth-regulating factor, putative, expressed
osa-miR396g	LOC_Os04g51190.3	0	growth-regulating factor, putative, expressed
osa-miR396g	LOC_Os06g10310.1	0	growth regulating factor protein, putative, expressed
osa-miR396g	LOC_Os12g29980.1	2	growth regulating factor protein, putative, expressed
osa-miR396g	LOC_Os12g29980.2	2	growth regulating factor protein, putative, expressed
osa-miR396h	LOC_Os02g28540.1	4	retrotransposon protein, putative, Ty3-gypsy subclass
osa-miR396h	LOC_Os06g02560.1	0	growth-regulating factor, putative, expressed
osa-miR396h	LOC_Os06g02560.2	0	growth-regulating factor, putative, expressed
osa-miR396h	LOC_Os06g02560.3	0	growth-regulating factor, putative, expressed
osa-miR396h	LOC_Os08g37980.1	4.5	retrotransposon protein, putative, Ty3-gypsy subclass
osa-miR396h	LOC_Os02g47280.1	0	growth-regulating factor, putative, expressed
osa-miR396h	LOC_Os02g47280.2	0	growth-regulating factor, putative, expressed
osa-miR396h	LOC_Os11g35030.1	2.5	growth regulating factor protein, putative, expressed
osa-miR396h	LOC_Os11g35030.2	2.5	growth regulating factor protein, putative, expressed
osa-miR396h	LOC_Os02g45570.1	0	growth regulating factor protein, putative, expressed
osa-miR396h	LOC_Os02g45570.2	0	growth regulating factor protein, putative, expressed
osa-miR396h	LOC_Os02g53690.1	0	growth regulating factor protein, putative, expressed
osa-miR396h	LOC_Os03g47140.1	0	growth regulating factor protein, putative, expressed
osa-miR396h	LOC_Os03g51970.1	2	growth-regulating factor, putative, expressed
osa-miR396h	LOC_Os04g48510.1	2	growth regulating factor protein, putative, expressed
osa-miR396h	LOC_Os04g51190.1	0	growth-regulating factor, putative, expressed
osa-miR396h	LOC_Os04g51190.2	0	growth-regulating factor, putative, expressed
osa-miR396h	LOC_Os04g51190.3	0	growth-regulating factor, putative, expressed
osa-miR396h	LOC_Os06g10310.1	0	growth regulating factor protein, putative, expressed
osa-miR396h	LOC_Os12g29980.1	2	growth regulating factor protein, putative, expressed
osa-miR396h	LOC_Os12g29980.2	2	growth regulating factor protein, putative, expressed
osa-miR396i	LOC_Os02g28540.1	4	retrotransposon protein, putative, Ty3-gypsy subclass
osa-miR396i	LOC_Os06g02560.1	0	growth-regulating factor, putative, expressed
osa-miR396i	LOC_Os06g02560.2	0	growth-regulating factor, putative, expressed
osa-miR396i	LOC_Os06g02560.3	0	growth-regulating factor, putative, expressed
osa-miR396i	LOC_Os08g37980.1	4.5	retrotransposon protein, putative, Ty3-gypsy subclass
osa-miR396i	LOC_Os02g47280.1	0	growth-regulating factor, putative, expressed
osa-miR396i	LOC_Os02g47280.2	0	growth-regulating factor, putative, expressed
osa-miR396i	LOC_Os11g35030.1	2.5	growth regulating factor protein, putative, expressed
osa-miR396i	LOC_Os11g35030.2	2.5	growth regulating factor protein, putative, expressed
osa-miR396i	LOC_Os02g45570.1	0	growth regulating factor protein, putative, expressed
osa-miR396i	LOC_Os02g45570.2	0	growth regulating factor protein, putative, expressed
osa-miR396i	LOC_Os02g53690.1	0	growth regulating factor protein, putative, expressed
osa-miR396i	LOC_Os03g47140.1	0	growth regulating factor protein, putative, expressed
osa-miR396i	LOC_Os03g51970.1	2	growth-regulating factor, putative, expressed
osa-miR396i	LOC_Os04g48510.1	2	growth regulating factor protein, putative, expressed
osa-miR396i	LOC_Os04g51190.1	0	growth-regulating factor, putative, expressed
osa-miR396i	LOC_Os04g51190.2	0	growth-regulating factor, putative, expressed
osa-miR396i	LOC_Os04g51190.3	0	growth-regulating factor, putative, expressed
osa-miR396i	LOC_Os06g10310.1	0	growth regulating factor protein, putative, expressed
osa-miR396i	LOC_Os12g29980.1	2	growth regulating factor protein, putative, expressed
osa-miR396i	LOC_Os12g29980.2	2	growth regulating factor protein, putative, expressed
osa-miR397a	LOC_Os02g34600.1	4.5	CAMK_CAMK_like.13 - CAMK includes calcium/calmodulin depedent protein kinases, expressed
osa-miR397a	LOC_Os02g34600.2	4.5	CAMK_CAMK_like.13 - CAMK includes calcium/calmodulin depedent protein kinases, expressed
osa-miR399d	LOC_Os05g48390.1	3	ubiquitin conjugating enzyme protein, putative, expressed
osa-miR399h	LOC_Os05g48390.1	2	ubiquitin conjugating enzyme protein, putative, expressed
osa-miR399j	LOC_Os05g48390.1	4	ubiquitin conjugating enzyme protein, putative, expressed
osa-miR408	LOC_Os04g46130.1	4.5	plastocyanin-like domain containing protein, putative, expressed
osa-miR408	LOC_Os08g37670.1	3	plastocyanin-like domain containing protein, putative, expressed
osa-miR408	LOC_Os06g11490.1	4	plastocyanin-like domain containing protein, putative, expressed
osa-miR408	LOC_Os03g50140.1	2.5	plastocyanin-like domain containing protein, putative, expressed
osa-miR441a	LOC_Os06g19990.1	4	GPI-anchored protein, putative, expressed
osa-miR441a	LOC_Os06g19990.2	4	GPI-anchored protein, putative, expressed
osa-miR441a	LOC_Os06g19990.3	4	GPI-anchored protein, putative, expressed
osa-miR441a	LOC_Os06g19990.4	4	GPI-anchored protein, putative, expressed
osa-miR441a	LOC_Os08g04300.1	3	fringe-related protein, putative, expressed
osa-miR441a	LOC_Os10g26720.1	4	exonuclease, putative, expressed
osa-miR441a	LOC_Os01g34620.8	4.5	OsGrx_S15.1 - glutaredoxin subgroup II, expressed
osa-miR441a	LOC_Os01g68230.1	2.5	expressed protein
osa-miR441a	LOC_Os01g68230.2	2.5	expressed protein
osa-miR441a	LOC_Os02g43560.1	3	OsWRKY34 - Superfamily of TFs having WRKY and zinc finger domains, expressed
osa-miR441a	LOC_Os02g44990.1	4	OsFBDUF13 - F-box and DUF domain containing protein, expressed
osa-miR441a	LOC_Os03g14910.1	3	expressed protein
osa-miR441a	LOC_Os03g52010.1	3.5	lecithin cholesterol acyltransferase, putative, expressed
osa-miR441a	LOC_Os06g47850.1	4	zinc finger family protein, putative, expressed
osa-miR441a	LOC_Os08g44850.1	3.5	C2 domain containing protein, putative, expressed
osa-miR441a	LOC_Os09g09820.1	2	retrotransposon protein, putative, unclassified, expressed
osa-miR441a	LOC_Os09g12230.1	4.5	ubiquitin-conjugating enzyme, putative, expressed
osa-miR441a	LOC_Os10g39520.1	4.5	MLO domain containing protein, putative, expressed
osa-miR441c	LOC_Os06g19990.1	4	GPI-anchored protein, putative, expressed
osa-miR441c	LOC_Os06g19990.2	4	GPI-anchored protein, putative, expressed
osa-miR441c	LOC_Os06g19990.3	4	GPI-anchored protein, putative, expressed
osa-miR441c	LOC_Os06g19990.4	4	GPI-anchored protein, putative, expressed
osa-miR441c	LOC_Os08g04300.1	3	fringe-related protein, putative, expressed
osa-miR441c	LOC_Os10g26720.1	4	exonuclease, putative, expressed
osa-miR441c	LOC_Os01g34620.8	4.5	OsGrx_S15.1 - glutaredoxin subgroup II, expressed
osa-miR441c	LOC_Os01g68230.1	2.5	expressed protein
osa-miR441c	LOC_Os01g68230.2	2.5	expressed protein
osa-miR441c	LOC_Os02g43560.1	3	OsWRKY34 - Superfamily of TFs having WRKY and zinc finger domains, expressed
osa-miR441c	LOC_Os02g44990.1	4	OsFBDUF13 - F-box and DUF domain containing protein, expressed
osa-miR441c	LOC_Os03g14910.1	3	expressed protein
osa-miR441c	LOC_Os03g52010.1	3.5	lecithin cholesterol acyltransferase, putative, expressed
osa-miR441c	LOC_Os06g47850.1	4	zinc finger family protein, putative, expressed
osa-miR441c	LOC_Os08g44850.1	3.5	C2 domain containing protein, putative, expressed
osa-miR441c	LOC_Os09g09820.1	2	retrotransposon protein, putative, unclassified, expressed
osa-miR441c	LOC_Os09g12230.1	4.5	ubiquitin-conjugating enzyme, putative, expressed
osa-miR441c	LOC_Os10g39520.1	4.5	MLO domain containing protein, putative, expressed
osa-miR442	LOC_Os01g56900.2	3	expressed protein
osa-miR442	LOC_Os07g08810.1	3	expressed protein
osa-miR442	LOC_Os07g08810.2	3	expressed protein
osa-miR442	LOC_Os01g37630.1	4	esterase, putative, expressed
osa-miR442	LOC_Os02g17304.1	3	resistance protein, putative, expressed
osa-miR442	LOC_Os06g47000.1	3	external NADH-ubiquinone oxidoreductase 1, mitochondrial precursor, putative, expressed
osa-miR442	LOC_Os06g47000.2	3	external NADH-ubiquinone oxidoreductase 1, mitochondrial precursor, putative, expressed
osa-miR442	LOC_Os06g47000.3	3	external NADH-ubiquinone oxidoreductase 1, mitochondrial precursor, putative, expressed
osa-miR442	LOC_Os07g46730.1	4.5	PPR repeat domain containing protein, putative, expressed
osa-miR442	LOC_Os12g12664.2	3	expressed protein
osa-miR444a.1	LOC_Os08g06510.1	4	zinc finger, C3HC4 type domain containing protein, expressed
osa-miR444a.1	LOC_Os11g43610.1	4	oxidoreductase, 2OG-Fe oxygenase family protein, putative, expressed
osa-miR444a.2	LOC_Os05g47560.1	4	serine/threonine-protein kinase SNT7, chloroplast precursor, putative, expressed
osa-miR444a.2	LOC_Os02g36924.1	4	OsMADS27 - MADS-box family gene with MIKCc type-box, expressed
osa-miR444a.2	LOC_Os02g49840.1	0	OsMADS57 - MADS-box family gene with MIKCc type-box, expressed
osa-miR444a.2	LOC_Os02g49840.2	0	OsMADS57 - MADS-box family gene with MIKCc type-box, expressed
osa-miR444a.2	LOC_Os02g49840.3	0	OsMADS57 - MADS-box family gene with MIKCc type-box, expressed
osa-miR444a.2	LOC_Os02g49840.4	0	OsMADS57 - MADS-box family gene with MIKCc type-box, expressed
osa-miR444a.2	LOC_Os04g38780.1	4	transcription factor, putative, expressed
osa-miR444a.2	LOC_Os08g06510.1	1.5	zinc finger, C3HC4 type domain containing protein, expressed
osa-miR444a.2	LOC_Os04g44800.1	4.5	expressed protein
osa-miR444b.1	LOC_Os02g49090.1	4	WD domain, G-beta repeat domain containing protein, expressed
osa-miR444b.1	LOC_Os02g49090.2	4	WD domain, G-beta repeat domain containing protein, expressed
osa-miR444b.1	LOC_Os05g49150.1	3	eukaryotic translation initiation factor 3 subunit D, putative, expressed
osa-miR444b.1	LOC_Os03g32499.1	4	expressed protein
osa-miR444c.1	LOC_Os02g49090.1	4	WD domain, G-beta repeat domain containing protein, expressed
osa-miR444c.1	LOC_Os02g49090.2	4	WD domain, G-beta repeat domain containing protein, expressed
osa-miR444c.1	LOC_Os05g49150.1	3	eukaryotic translation initiation factor 3 subunit D, putative, expressed
osa-miR444c.1	LOC_Os03g32499.1	4	expressed protein
osa-miR444d.1	LOC_Os08g06510.1	4	zinc finger, C3HC4 type domain containing protein, expressed
osa-miR444d.1	LOC_Os11g43610.1	4	oxidoreductase, 2OG-Fe oxygenase family protein, putative, expressed
osa-miR444d.2	LOC_Os05g47560.1	4	serine/threonine-protein kinase SNT7, chloroplast precursor, putative, expressed
osa-miR444d.2	LOC_Os02g36924.1	4	OsMADS27 - MADS-box family gene with MIKCc type-box, expressed
osa-miR444d.2	LOC_Os02g49840.1	0	OsMADS57 - MADS-box family gene with MIKCc type-box, expressed
osa-miR444d.2	LOC_Os02g49840.2	0	OsMADS57 - MADS-box family gene with MIKCc type-box, expressed
osa-miR444d.2	LOC_Os02g49840.3	0	OsMADS57 - MADS-box family gene with MIKCc type-box, expressed
osa-miR444d.2	LOC_Os02g49840.4	0	OsMADS57 - MADS-box family gene with MIKCc type-box, expressed
osa-miR444d.2	LOC_Os04g38780.1	4	transcription factor, putative, expressed
osa-miR444d.2	LOC_Os08g06510.1	1.5	zinc finger, C3HC4 type domain containing protein, expressed
osa-miR444d.2	LOC_Os04g44800.1	4.5	expressed protein
osa-miR444d.3	LOC_Os02g49840.1	0	OsMADS57 - MADS-box family gene with MIKCc type-box, expressed
osa-miR444d.3	LOC_Os02g49840.2	0	OsMADS57 - MADS-box family gene with MIKCc type-box, expressed
osa-miR444d.3	LOC_Os02g49840.4	0	OsMADS57 - MADS-box family gene with MIKCc type-box, expressed
osa-miR444d.3	LOC_Os08g17820.1	4.5	retrotransposon protein, putative, unclassified, expressed
osa-miR444d.3	LOC_Os08g17820.2	4.5	retrotransposon protein, putative, unclassified, expressed
osa-miR444d.3	LOC_Os04g33780.1	4.5	OTU-like cysteine protease family protein, putative, expressed
osa-miR444d.3	LOC_Os04g33780.2	4.5	OTU-like cysteine protease family protein, putative, expressed
osa-miR444f	LOC_Os02g36924.1	2	OsMADS27 - MADS-box family gene with MIKCc type-box, expressed
osa-miR444f	LOC_Os02g49840.1	1	OsMADS57 - MADS-box family gene with MIKCc type-box, expressed
osa-miR444f	LOC_Os02g49840.2	1	OsMADS57 - MADS-box family gene with MIKCc type-box, expressed
osa-miR444f	LOC_Os02g49840.3	1	OsMADS57 - MADS-box family gene with MIKCc type-box, expressed
osa-miR444f	LOC_Os02g49840.4	1	OsMADS57 - MADS-box family gene with MIKCc type-box, expressed
osa-miR444f	LOC_Os04g38780.1	2	transcription factor, putative, expressed
osa-miR444f	LOC_Os06g17290.1	4.5	phosphatidylinositol 3- and 4-kinase family protein, putative, expressed
osa-miR444f	LOC_Os08g06510.1	2.5	zinc finger, C3HC4 type domain containing protein, expressed
osa-miR444f	LOC_Os01g44990.1	3.5	ercc6 protein, putative, expressed
osa-miR528	LOC_Os06g37150.1	3	L-ascorbate oxidase precursor, putative, expressed
osa-miR528	LOC_Os06g06050.1	3.5	OsFBL27 - F-box domain and LRR containing protein, expressed
osa-miR528	LOC_Os06g11310.1	4.5	plastocyanin-like domain containing protein, putative, expressed
osa-miR528	LOC_Os02g31220.1	4	expressed protein
osa-miR528	LOC_Os02g31220.2	4	expressed protein
osa-miR528	LOC_Os07g38290.1	2	plastocyanin-like domain containing protein, putative, expressed
osa-miR528	LOC_Os08g04310.1	3.5	plastocyanin-like domain containing protein, putative, expressed
osa-miR528	LOC_Os08g36420.1	4	metal cation transporter, putative, expressed
osa-miR528	LOC_Os08g36420.2	4	metal cation transporter, putative, expressed
osa-miR528	LOC_Os08g36420.3	4	metal cation transporter, putative, expressed
osa-miR528	LOC_Os08g36420.4	4	metal cation transporter, putative, expressed
osa-miR528	LOC_Os08g36420.5	4	metal cation transporter, putative, expressed
osa-miR528	LOC_Os08g42640.1	4	zinc finger, C3HC4 type domain containing protein, expressed
osa-miR529b	LOC_Os01g65230.1	4	AGC_AGC_other_PDK1_Pk61C.1 - ACG kinases include homologs to PKA, PKG and PKC, expressed
osa-miR529b	LOC_Os02g16630.2	4	tryptophan biosynthesis protein trpCF, putative, expressed
osa-miR529b	LOC_Os04g40860.1	4.5	transposon protein, putative, unclassified, expressed
osa-miR529b	LOC_Os07g12340.1	4.5	NAC domain-containing protein 67, putative, expressed
osa-miR529b	LOC_Os07g29310.1	4	OsSAUR30 - Auxin-responsive SAUR gene family member, expressed
osa-miR529b	LOC_Os08g06880.1	4.5	expressed protein
osa-miR529b	LOC_Os10g39540.2	4.5	protein phosphatase 2C, putative, expressed
osa-miR529b	LOC_Os10g39540.3	4.5	protein phosphatase 2C, putative, expressed
osa-miR529b	LOC_Os10g39540.4	4.5	protein phosphatase 2C, putative, expressed
osa-miR529b	LOC_Os01g69830.1	2.5	OsSPL2 - SBP-box gene family member, expressed
osa-miR529b	LOC_Os06g49010.1	3	OsSPL12 - SBP-box gene family member, expressed
osa-miR529b	LOC_Os06g49010.2	3	OsSPL12 - SBP-box gene family member, expressed
osa-miR529b	LOC_Os06g49010.3	3	OsSPL12 - SBP-box gene family member, expressed
osa-miR529b	LOC_Os06g49010.4	3	OsSPL12 - SBP-box gene family member, expressed
osa-miR529b	LOC_Os06g49010.5	3	OsSPL12 - SBP-box gene family member, expressed
osa-miR529b	LOC_Os06g49010.6	3	OsSPL12 - SBP-box gene family member, expressed
osa-miR529b	LOC_Os06g50100.1	4.5	tyrosine protein kinase domain containing protein, putative, expressed
osa-miR529b	LOC_Os07g32170.1	4.5	OsSPL13 - SBP-box gene family member, expressed
osa-miR529b	LOC_Os07g32170.2	4.5	OsSPL13 - SBP-box gene family member, expressed
osa-miR529b	LOC_Os08g39890.1	1	OsSPL14 - SBP-box gene family member, expressed
osa-miR529b	LOC_Os09g31438.1	1.5	OsSPL17 - SBP-box gene family member, expressed
osa-miR529b	LOC_Os09g32944.1	3.5	OsSPL18 - SBP-box gene family member, expressed
osa-miR530-3p	LOC_Os08g33320.1	3.5	expressed protein
osa-miR530-5p	LOC_Os02g14990.1	4	zinc finger, C3HC4 type domain containing protein, expressed
osa-miR530-5p	LOC_Os02g24190.1	4.5	cyclin-T1-2, putative, expressed
osa-miR530-5p	LOC_Os02g24190.2	4.5	cyclin-T1-2, putative, expressed
osa-miR530-5p	LOC_Os02g24190.3	4.5	cyclin-T1-2, putative, expressed
osa-miR530-5p	LOC_Os05g46420.1	4	expressed protein
osa-miR530-5p	LOC_Os03g18540.1	4.5	expressed protein
osa-miR530-5p	LOC_Os03g18540.2	4.5	expressed protein
osa-miR530-5p	LOC_Os03g18540.4	4.5	expressed protein
osa-miR530-5p	LOC_Os07g06990.1	4.5	expressed protein
osa-miR530-5p	LOC_Os07g06990.2	4.5	expressed protein
osa-miR531b	LOC_Os03g48220.1	4	expressed protein
osa-miR531b	LOC_Os03g48250.1	4	expressed protein
osa-miR531b	LOC_Os07g10150.1	4	coatomer subunit gamma-2, putative, expressed
osa-miR810b.1	LOC_Os02g27000.1	4	ATP-binding region, ATPase-like domain containing protein, expressed
osa-miR812a	LOC_Os02g23823.2	1	helix-loop-helix DNA-binding domain containing protein, expressed
osa-miR812a	LOC_Os03g12620.1	1.5	glycosyl hydrolases family 17, putative, expressed
osa-miR812a	LOC_Os03g12620.2	1.5	glycosyl hydrolases family 17, putative, expressed
osa-miR812a	LOC_Os10g07340.1	3.5	expressed protein
osa-miR812a	LOC_Os02g07960.2	4.5	STRUBBELIG-RECEPTOR FAMILY 3 precursor, putative, expressed
osa-miR812a	LOC_Os02g07960.3	4.5	STRUBBELIG-RECEPTOR FAMILY 3 precursor, putative, expressed
osa-miR812a	LOC_Os02g07960.4	4.5	STRUBBELIG-RECEPTOR FAMILY 3 precursor, putative, expressed
osa-miR812a	LOC_Os03g22050.1	2.5	CAMK_KIN1/SNF1/Nim1_like.16 - CAMK includes calcium/calmodulin depedent protein kinases, expressed
osa-miR812a	LOC_Os03g22050.2	2.5	CAMK_KIN1/SNF1/Nim1_like.16 - CAMK includes calcium/calmodulin depedent protein kinases, expressed
osa-miR812a	LOC_Os03g22050.3	2.5	CAMK_KIN1/SNF1/Nim1_like.16 - CAMK includes calcium/calmodulin depedent protein kinases, expressed
osa-miR812a	LOC_Os03g22050.4	2.5	CAMK_KIN1/SNF1/Nim1_like.16 - CAMK includes calcium/calmodulin depedent protein kinases, expressed
osa-miR812a	LOC_Os06g50146.1	3	calcium-dependent protein kinase CPK1 adapter protein 2, putative, expressed
osa-miR812a	LOC_Os09g02214.3	3.5	Citrate transporter protein, putative, expressed
osa-miR812a	LOC_Os09g37540.1	3.5	uncharacterized protein PA4923, putative, expressed
osa-miR812a	LOC_Os11g09260.1	2.5	expressed protein
osa-miR812a	LOC_Os11g34910.1	4	expressed protein
osa-miR812b	LOC_Os02g23823.2	1	helix-loop-helix DNA-binding domain containing protein, expressed
osa-miR812b	LOC_Os03g12620.1	1.5	glycosyl hydrolases family 17, putative, expressed
osa-miR812b	LOC_Os03g12620.2	1.5	glycosyl hydrolases family 17, putative, expressed
osa-miR812b	LOC_Os10g07340.1	3.5	expressed protein
osa-miR812b	LOC_Os02g07960.2	4.5	STRUBBELIG-RECEPTOR FAMILY 3 precursor, putative, expressed
osa-miR812b	LOC_Os02g07960.3	4.5	STRUBBELIG-RECEPTOR FAMILY 3 precursor, putative, expressed
osa-miR812b	LOC_Os02g07960.4	4.5	STRUBBELIG-RECEPTOR FAMILY 3 precursor, putative, expressed
osa-miR812b	LOC_Os03g22050.1	2.5	CAMK_KIN1/SNF1/Nim1_like.16 - CAMK includes calcium/calmodulin depedent protein kinases, expressed
osa-miR812b	LOC_Os03g22050.2	2.5	CAMK_KIN1/SNF1/Nim1_like.16 - CAMK includes calcium/calmodulin depedent protein kinases, expressed
osa-miR812b	LOC_Os03g22050.3	2.5	CAMK_KIN1/SNF1/Nim1_like.16 - CAMK includes calcium/calmodulin depedent protein kinases, expressed
osa-miR812b	LOC_Os03g22050.4	2.5	CAMK_KIN1/SNF1/Nim1_like.16 - CAMK includes calcium/calmodulin depedent protein kinases, expressed
osa-miR812b	LOC_Os06g50146.1	3	calcium-dependent protein kinase CPK1 adapter protein 2, putative, expressed
osa-miR812b	LOC_Os09g02214.3	3.5	Citrate transporter protein, putative, expressed
osa-miR812b	LOC_Os09g37540.1	3.5	uncharacterized protein PA4923, putative, expressed
osa-miR812b	LOC_Os11g09260.1	2.5	expressed protein
osa-miR812b	LOC_Os11g34910.1	4	expressed protein
osa-miR812c	LOC_Os02g23823.2	1	helix-loop-helix DNA-binding domain containing protein, expressed
osa-miR812c	LOC_Os03g12620.1	1.5	glycosyl hydrolases family 17, putative, expressed
osa-miR812c	LOC_Os03g12620.2	1.5	glycosyl hydrolases family 17, putative, expressed
osa-miR812c	LOC_Os10g07340.1	3.5	expressed protein
osa-miR812c	LOC_Os02g07960.2	4.5	STRUBBELIG-RECEPTOR FAMILY 3 precursor, putative, expressed
osa-miR812c	LOC_Os02g07960.3	4.5	STRUBBELIG-RECEPTOR FAMILY 3 precursor, putative, expressed
osa-miR812c	LOC_Os02g07960.4	4.5	STRUBBELIG-RECEPTOR FAMILY 3 precursor, putative, expressed
osa-miR812c	LOC_Os03g22050.1	2.5	CAMK_KIN1/SNF1/Nim1_like.16 - CAMK includes calcium/calmodulin depedent protein kinases, expressed
osa-miR812c	LOC_Os03g22050.2	2.5	CAMK_KIN1/SNF1/Nim1_like.16 - CAMK includes calcium/calmodulin depedent protein kinases, expressed
osa-miR812c	LOC_Os03g22050.3	2.5	CAMK_KIN1/SNF1/Nim1_like.16 - CAMK includes calcium/calmodulin depedent protein kinases, expressed
osa-miR812c	LOC_Os03g22050.4	2.5	CAMK_KIN1/SNF1/Nim1_like.16 - CAMK includes calcium/calmodulin depedent protein kinases, expressed
osa-miR812c	LOC_Os06g50146.1	3	calcium-dependent protein kinase CPK1 adapter protein 2, putative, expressed
osa-miR812c	LOC_Os09g02214.3	3.5	Citrate transporter protein, putative, expressed
osa-miR812c	LOC_Os09g37540.1	3.5	uncharacterized protein PA4923, putative, expressed
osa-miR812c	LOC_Os11g09260.1	2.5	expressed protein
osa-miR812c	LOC_Os11g34910.1	4	expressed protein
osa-miR812e	LOC_Os02g23823.2	1	helix-loop-helix DNA-binding domain containing protein, expressed
osa-miR812e	LOC_Os03g12620.1	1.5	glycosyl hydrolases family 17, putative, expressed
osa-miR812e	LOC_Os03g12620.2	1.5	glycosyl hydrolases family 17, putative, expressed
osa-miR812e	LOC_Os10g07340.1	3.5	expressed protein
osa-miR812e	LOC_Os02g07960.2	4.5	STRUBBELIG-RECEPTOR FAMILY 3 precursor, putative, expressed
osa-miR812e	LOC_Os02g07960.3	4.5	STRUBBELIG-RECEPTOR FAMILY 3 precursor, putative, expressed
osa-miR812e	LOC_Os02g07960.4	4.5	STRUBBELIG-RECEPTOR FAMILY 3 precursor, putative, expressed
osa-miR812e	LOC_Os03g22050.1	2.5	CAMK_KIN1/SNF1/Nim1_like.16 - CAMK includes calcium/calmodulin depedent protein kinases, expressed
osa-miR812e	LOC_Os03g22050.2	2.5	CAMK_KIN1/SNF1/Nim1_like.16 - CAMK includes calcium/calmodulin depedent protein kinases, expressed
osa-miR812e	LOC_Os03g22050.3	2.5	CAMK_KIN1/SNF1/Nim1_like.16 - CAMK includes calcium/calmodulin depedent protein kinases, expressed
osa-miR812e	LOC_Os03g22050.4	2.5	CAMK_KIN1/SNF1/Nim1_like.16 - CAMK includes calcium/calmodulin depedent protein kinases, expressed
osa-miR812e	LOC_Os06g50146.1	3	calcium-dependent protein kinase CPK1 adapter protein 2, putative, expressed
osa-miR812e	LOC_Os09g02214.3	3.5	Citrate transporter protein, putative, expressed
osa-miR812e	LOC_Os09g37540.1	3.5	uncharacterized protein PA4923, putative, expressed
osa-miR812e	LOC_Os11g09260.1	2.5	expressed protein
osa-miR812e	LOC_Os11g34910.1	4	expressed protein
osa-miR815a	LOC_Os01g65450.1	4.5	ubiquitin-like domain-containing CTD phosphatase 1, putative, expressed
osa-miR815a	LOC_Os01g65450.2	4.5	ubiquitin-like domain-containing CTD phosphatase 1, putative, expressed
osa-miR815a	LOC_Os10g25130.1	4	aminotransferase, classes I and II, domain containing protein, expressed
osa-miR815b	LOC_Os01g65450.1	4.5	ubiquitin-like domain-containing CTD phosphatase 1, putative, expressed
osa-miR815b	LOC_Os01g65450.2	4.5	ubiquitin-like domain-containing CTD phosphatase 1, putative, expressed
osa-miR815b	LOC_Os10g25130.1	4	aminotransferase, classes I and II, domain containing protein, expressed
osa-miR815c	LOC_Os01g65450.1	4.5	ubiquitin-like domain-containing CTD phosphatase 1, putative, expressed
osa-miR815c	LOC_Os01g65450.2	4.5	ubiquitin-like domain-containing CTD phosphatase 1, putative, expressed
osa-miR815c	LOC_Os10g25130.1	4	aminotransferase, classes I and II, domain containing protein, expressed
osa-miR818d	LOC_Os01g63880.1	0	expressed protein
osa-miR818d	LOC_Os01g72370.2	2.5	helix-loop-helix DNA-binding domain containing protein, expressed
osa-miR818d	LOC_Os03g48010.1	0.5	exostosin, putative, expressed
osa-miR818d	LOC_Os03g50390.1	4	AGC_AGC_other_GWLd.2 - ACG kinases include homologs to PKA, PKG and PKC, expressed
osa-miR818d	LOC_Os03g50390.2	4	AGC_AGC_other_GWLd.2 - ACG kinases include homologs to PKA, PKG and PKC, expressed
osa-miR818d	LOC_Os04g39160.1	2	RNA-dependent RNA polymerase, putative, expressed
osa-miR818d	LOC_Os05g43570.1	2	AGC_AGC_other_NDRh_TRCd.2 - ACG kinases include homologs to PKA, PKG and PKC, expressed
osa-miR818d	LOC_Os06g05530.1	2.5	RNA recognition motif containing protein, putative, expressed
osa-miR818d	LOC_Os06g05530.2	2.5	RNA recognition motif containing protein, putative, expressed
osa-miR818d	LOC_Os06g05530.3	2.5	RNA recognition motif containing protein, putative, expressed
osa-miR818d	LOC_Os06g39330.1	1.5	UDP-glucoronosyl and UDP-glucosyl transferase domain containing protein, expressed
osa-miR818d	LOC_Os09g36320.1	0	tyrosine protein kinase domain containing protein, putative, expressed
osa-miR818d	LOC_Os09g37020.1	4	expressed protein
osa-miR818d	LOC_Os09g37020.2	4	expressed protein
osa-miR818d	LOC_Os09g37020.3	4	expressed protein
osa-miR818d	LOC_Os02g10210.1	2	expressed protein
osa-miR818d	LOC_Os03g49126.1	2.5	expressed protein
osa-miR818d	LOC_Os04g57154.1	3	expressed protein
osa-miR818d	LOC_Os06g11500.1	0	MCM9 - Putative minichromosome maintenance MCM family subunit 9, expressed
osa-miR818d	LOC_Os08g29760.1	1.5	membrane protein, putative, expressed
osa-miR818d	LOC_Os08g41080.1	4	expressed protein
osa-miR827a	LOC_Os04g48390.1	3	uncharacterized membrane protein, putative, expressed
osa-miR827b	LOC_Os04g48390.1	3	uncharacterized membrane protein, putative, expressed
The mRNA-miRNA interaction information in online (http://starbase.sysu.edu.cn/)

## Sheet: 48 miRNA psRNA Target
Supplementary Table S7. (B) Predicted targets of differentially expressed known miRNAs using psRNA Target
miRNA	Target accession	Expectation	UPE	miRNA start	miRNA end	Target start	Target end	miRNA aligned fragment (5'-3')	Target aligned fragment (5'-3')	Inhibition	Target description	Multiplicity
osa-miR1317-5p	LOC_Os03g02010.2|13103.m00142|cDNA	2.5	20.769	1	22	375	396	UAGGGAACCCCAUUCCCAUAAA	UUUAUGGGAAUGGGAUUCCCAA	Cleavage	DNA methyltransferase protein, putative, expressed	1
osa-miR1317-5p	LOC_Os03g02010.1|13103.m00143|cDNA	2.5	17.186	1	22	375	396	UAGGGAACCCCAUUCCCAUAAA	UUUAUGGGAAUGGGAUUCCCAA	Cleavage	DNA methyltransferase protein, putative, expressed	1
osa-miR1317-5p	LOC_Os03g02010.3|13103.m00141|cDNA	2.5	20.769	1	22	375	396	UAGGGAACCCCAUUCCCAUAAA	UUUAUGGGAAUGGGAUUCCCAA	Cleavage	DNA methyltransferase protein, putative, expressed	1
osa-miR1317-5p	LOC_Os03g02010.4|13103.m00144|cDNA	2.5	17.186	1	22	375	396	UAGGGAACCCCAUUCCCAUAAA	UUUAUGGGAAUGGGAUUCCCAA	Cleavage	DNA methyltransferase protein, putative, expressed	1
osa-miR1317-5p	LOC_Os05g36160.1|13105.m03798|cDNA	2.5	18.107	1	20	658	677	UAGGGAACCCCAUUCCCAUA	UAUGGUUGUGGGGUUCCCUA	Cleavage	G-box-binding factor 4, putative, expressed	1
osa-miR1317-5p	LOC_Os05g36160.2|13105.m03797|cDNA	2.5	18.107	1	20	658	677	UAGGGAACCCCAUUCCCAUA	UAUGGUUGUGGGGUUCCCUA	Cleavage	G-box-binding factor 4, putative, expressed	1
osa-miR1317-5p.2	LOC_Os03g02010.2|13103.m00142|cDNA	2.5	18.045	1	24	397	420	AGAUUGCUUUCAAGGUCAUUUCUU	AAGAAAUGAUCUUGAAAGCGAUUA	Cleavage	DNA methyltransferase protein, putative, expressed	1
osa-miR1317-5p.2	LOC_Os03g02010.1|13103.m00143|cDNA	2.5	20.32	1	24	397	420	AGAUUGCUUUCAAGGUCAUUUCUU	AAGAAAUGAUCUUGAAAGCGAUUA	Cleavage	DNA methyltransferase protein, putative, expressed	1
osa-miR1317-5p.2	LOC_Os03g02010.3|13103.m00141|cDNA	2.5	18.045	1	24	397	420	AGAUUGCUUUCAAGGUCAUUUCUU	AAGAAAUGAUCUUGAAAGCGAUUA	Cleavage	DNA methyltransferase protein, putative, expressed	1
osa-miR1317-5p.2	LOC_Os03g02010.4|13103.m00144|cDNA	2.5	20.32	1	24	397	420	AGAUUGCUUUCAAGGUCAUUUCUU	AAGAAAUGAUCUUGAAAGCGAUUA	Cleavage	DNA methyltransferase protein, putative, expressed	1
osa-miR1317-5p.2	LOC_Os04g26490.1|13104.m02508|cDNA	2.5	16.378	1	24	3429	3452	AGAUUGCUUUCAAGGUCAUUUCUU	AACAAAUGGCUUGGAAAGUAAUCU	Cleavage	expressed protein	1
osa-miR1423	LOC_Os01g59560.1|13101.m06332|cDNA	3	24.926	1	24	2554	2577	AGCGCCCAAGCGGUAGUUGUCUCC	GUGGACGGCUACUGCUUGGGUGCC	Cleavage	protein kinase domain containing protein	1
osa-miR159a.2	LOC_Os03g02240.1|13103.m00177|cDNA	1	21.858	1	20	2120	2139	UUGCAUGCCCCAGGAGCUGC	GCAGCUCCGGGGGCAUGCAA	Cleavage	AT-GTL1, putative, expressed	1
osa-miR159a.2	LOC_Os10g37240.2|13110.m03378|cDNA	1.5	19.958	1	20	1531	1550	UUGCAUGCCCCAGGAGCUGC	GCGGCUCCGGGGGCAUGCAA	Cleavage	expressed protein	1
osa-miR159a.2	LOC_Os10g37240.4|13110.m03380|cDNA	1.5	19.958	1	20	2114	2133	UUGCAUGCCCCAGGAGCUGC	GCGGCUCCGGGGGCAUGCAA	Cleavage	expressed protein	1
osa-miR159a.2	LOC_Os10g37240.3|13110.m03379|cDNA	1.5	19.958	1	20	597	616	UUGCAUGCCCCAGGAGCUGC	GCGGCUCCGGGGGCAUGCAA	Cleavage	expressed protein	1
osa-miR159a.2	LOC_Os10g40920.1|13110.m03797|cDNA	2.5	24.57	1	20	2101	2120	UUGCAUGCCCCAGGAGCUGC	GCAGUUCUUAGGGCAUGCAG	Translation	pentatricopeptide, putative, expressed	1
osa-miR159a.2	LOC_Os03g28310.1|13103.m03304|cDNA	2.5	13.904	1	20	821	840	UUGCAUGCCCCAGGAGCUGC	GCAGCUCCUGGUGCAUCCAA	Translation	dnaJ domain containing protein, expressed	1
osa-miR159a.2	LOC_Os08g10800.1|13108.m01153|cDNA	3	20.282	1	20	173	192	UUGCAUGCCCCAGGAGCUGC	GUGGUUCUUGGGGUAUGCAG	Cleavage	hypothetical protein	1
osa-miR159a.2	LOC_Os12g24550.1|13112.m02491|cDNA	2.5	21.337	1	20	2017	2036	UUGCAUGCCCCAGGAGCUGC	GCAGCUUGUGAGGCAUGCAA	Translation	expressed protein	1
osa-miR159a.2	LOC_Os02g05720.1|13102.m00630|cDNA	3	18.448	1	20	2170	2189	UUGCAUGCCCCAGGAGCUGC	GCUCUUCUUGGGGCAUGCAA	Cleavage	pentatricopeptide repeat protein PPR986-12, putative, expressed	1
osa-miR168a-3p	LOC_Os06g44034.1|13106.m04621|cDNA	3	21.896	1	20	257	276	GAUCCCGCCUUGCACCAAGU	UCUUGGGGCGGGGCGGGAUC	Cleavage	expressed protein	1
osa-miR168a-3p	LOC_Os12g20370.1|13112.m02161|cDNA	3	24.567	1	20	505	524	GAUCCCGCCUUGCACCAAGU	UCUUCGUCCAAGGCGGGAUC	Cleavage	hypothetical protein	1
osa-miR1846a-5p	LOC_Os08g10350.1|13108.m01102|cDNA	2.5	15.721	1	23	475	497	AGUGAGGAGGCCGGGGCCGCUGG	UCAGCUACCCUGGCCUCCUCACU	Cleavage	integral membrane family protein, putative, expressed	1
osa-miR1846a-5p	LOC_Os02g07890.2|13102.m00904|cDNA	3	22.437	1	23	461	483	AGUGAGGAGGCCGGGGCCGCUGG	CCGGCGGCGCCGUCCUCCUCACC	Translation	60S ribosomal protein L27a-3, putative, expressed	1
osa-miR1846b-5p	LOC_Os08g10350.1|13108.m01102|cDNA	2.5	15.721	1	23	475	497	AGUGAGGAGGCCGGGGCCGCUGG	UCAGCUACCCUGGCCUCCUCACU	Cleavage	integral membrane family protein, putative, expressed	1
osa-miR1846b-5p	LOC_Os02g07890.2|13102.m00904|cDNA	3	22.437	1	23	461	483	AGUGAGGAGGCCGGGGCCGCUGG	CCGGCGGCGCCGUCCUCCUCACC	Translation	60S ribosomal protein L27a-3, putative, expressed	1
osa-miR1853-3p	LOC_Os08g01140.1|13108.m00018|cDNA	3	14.047	1	24	1088	1111	AUGGUAAUUGGGGAUGUUCGGUUG	CCAUCGUGCAUCUUUAAUUACCAU	Cleavage	cytochrome b561, putative, expressed	1
osa-miR1853-3p	LOC_Os12g32110.1|13112.m03274|cDNA	3	19.209	1	23	1347	1369	AUGGUAAUUGGGGAUGUUCGGUU	AGAUGAACAUCUCCAAUUACAGU	Cleavage	transposon protein, putative, CACTA, En/Spm sub-class	1
osa-miR1854-3p	LOC_Os11g35200.1|13111.m03426|cDNA	3	19.011	1	22	596	617	UCCAAUUUGGGGAUUUGCUGAU	GUCAUCGAGUUCCUAAAUUGGA	Cleavage	retrotransposon protein, putative, unclassified	1
osa-miR1854-3p	LOC_Os11g34680.1|13111.m03367|cDNA	3	11.944	1	22	259	280	UCCAAUUUGGGGAUUUGCUGAU	AUCAGCACCUCCCCCAAUUGGA	Cleavage	RNA recognition motif containing protein, putative, expressed	1
osa-miR1854-3p	LOC_Os02g42280.1|13102.m04674|cDNA	2.5	18.788	1	22	830	852	UCCAAUUUGG-GGAUUUGCUGAU	ACCAGCAAAUCCUCCAAGUUGGA	Translation	UDP-glucoronosyl/UDP-glucosyl transferase family protein, putative, expressed	1
osa-miR1854-3p	LOC_Os12g25650.1|13112.m02600|cDNA	3	19.988	1	20	2	21	UCCAAUUUGGGGAUUUGCUG	UGGCAAAUCUACAAGUUGGA	Translation	hypothetical protein	1
osa-miR1854-3p	LOC_Os11g39618.1|13111.m03914|cDNA	3	18.44	1	20	357	376	UCCAAUUUGGGGAUUUGCUG	CAGCGCAUUCCCAAAUUGGU	Cleavage	conserved hypothetical protein	1
osa-miR1854-3p	LOC_Os11g39568.1|13111.m03909|cDNA	3	18.44	1	20	357	376	UCCAAUUUGGGGAUUUGCUG	CAGCGCAUUCCCAAAUUGGU	Cleavage	expressed protein	1
osa-miR1859	LOC_Os02g43780.1|13102.m04863|cDNA	2	14.567	1	22	381	402	UUUCCUAUGACGUCCAUUCCAA	UUGGAAUGGGUAUCAUAGGAAA	Translation	hAT dimerisation domain-containing protein, putative	1
osa-miR1859	LOC_Os01g25810.1|13101.m02733|cDNA	3	17.14	1	22	605	626	UUUCCUAUGACGUCCAUUCCAA	UUGGAAUGGGUGGCCUAGGAAA	Translation	powdery mildew resistance protein PM3A, putative, expressed	1
osa-miR1859	LOC_Os11g40160.1|13111.m03972|cDNA	3	18.811	1	22	1602	1623	UUUCCUAUGACGUCCAUUCCAA	UUGGAAUGGGGGGUAUAGGAAA	Translation	expressed protein	1
osa-miR1859	LOC_Os07g30970.2|13107.m03128|cDNA	3	20.041	1	21	939	959	UUUCCUAUGACGUCCAUUCCA	UGGAUUGGAUGUGAUGGGAAA	Translation	nucleoside diphosphate kinase, putative, expressed	1
osa-miR1859	LOC_Os07g30970.1|13107.m03127|cDNA	3	20.041	1	21	741	761	UUUCCUAUGACGUCCAUUCCA	UGGAUUGGAUGUGAUGGGAAA	Translation	nucleoside diphosphate kinase, putative, expressed	1
osa-miR1861b	LOC_Os01g63810.2|13101.m06848|cDNA	3	20.214	1	20	610	629	CGAUCUUGAGGCAGGAACUG	AAGUUCUUGCUGCAAGAUCG	Translation	starch binding domain containing protein, putative, expressed	1
osa-miR1861b	LOC_Os01g63810.1|13101.m06847|cDNA	3	20.214	1	20	666	685	CGAUCUUGAGGCAGGAACUG	AAGUUCUUGCUGCAAGAUCG	Translation	starch binding domain containing protein, putative, expressed	1
osa-miR1861b	LOC_Os05g51790.1|13105.m05600|cDNA	3	19.225	1	22	578	599	CGAUCUUGAGGCAGGAACUGAG	CCCAGUUUCUUCCUCAAGACCG	Cleavage	RecF/RecN/SMC N terminal domain containing protein, expressed	1
osa-miR1861b	LOC_Os05g51790.2|13105.m05601|cDNA	3	19.225	1	22	533	554	CGAUCUUGAGGCAGGAACUGAG	CCCAGUUUCUUCCUCAAGACCG	Cleavage	RecF/RecN/SMC N terminal domain containing protein, expressed	1
osa-miR1861d	LOC_Os03g08624.1|13103.m00998|cDNA	3	20.87	1	20	921	940	UCUUGAGGCAGGAACUGAGU	UUUCAGUUCUUGUUUCAAGA	Cleavage	dihydroflavonol-4-reductase, putative, expressed	1
osa-miR1861d	LOC_Os05g17130.1|13105.m01808|cDNA	3	12.21	1	20	784	803	UCUUGAGGCAGGAACUGAGU	UGUGAGUUCCUGCCUCAAGA	Cleavage	retrotransposon protein, putative, Ty3-gypsy subclass	1
osa-miR1861d	LOC_Os09g37000.2|13109.m03659|cDNA	3	21.642	1	20	1480	1499	UCUUGAGGCAGGAACUGAGU	UUUCAGUUGCUGCCUCAAGG	Cleavage	26S proteasome non-ATPase regulatory subunit 3, putative, expressed	1
osa-miR1861d	LOC_Os09g37000.1|13109.m03660|cDNA	3	21.642	1	20	1598	1617	UCUUGAGGCAGGAACUGAGU	UUUCAGUUGCUGCCUCAAGG	Cleavage	26S proteasome non-ATPase regulatory subunit 3, putative, expressed	1
osa-miR1861d	LOC_Os05g51790.1|13105.m05600|cDNA	2.5	19.216	1	20	577	596	UCUUGAGGCAGGAACUGAGU	ACCCAGUUUCUUCCUCAAGA	Translation	RecF/RecN/SMC N terminal domain containing protein, expressed	1
osa-miR1861d	LOC_Os05g51790.2|13105.m05601|cDNA	2.5	19.216	1	20	532	551	UCUUGAGGCAGGAACUGAGU	ACCCAGUUUCUUCCUCAAGA	Translation	RecF/RecN/SMC N terminal domain containing protein, expressed	1
osa-miR1861e	LOC_Os01g63810.2|13101.m06848|cDNA	2.5	20.214	1	20	610	629	CGGUCUUGUGGCAAGAACUG	AAGUUCUUGCUGCAAGAUCG	Cleavage	starch binding domain containing protein, putative, expressed	1
osa-miR1861e	LOC_Os01g63810.1|13101.m06847|cDNA	2.5	20.214	1	20	666	685	CGGUCUUGUGGCAAGAACUG	AAGUUCUUGCUGCAAGAUCG	Cleavage	starch binding domain containing protein, putative, expressed	1
osa-miR1861e	LOC_Os06g44970.1|13106.m04727|cDNA	3	21.835	1	21	1696	1716	CGGUCUUGUGGCAAGAACUGA	UCAUUUCUUGUGGCAAGACCG	Translation	auxin efflux carrier component, putative, expressed	1
osa-miR1861e	LOC_Os03g18710.1|13103.m02240|cDNA	2.5	19.429	1	20	4045	4064	CGGUCUUGUGGCAAGAACUG	CAGUUCUUGCAAAGAGACCG	Translation	expressed protein	1
osa-miR1861f	LOC_Os01g63810.2|13101.m06848|cDNA	3	20.214	1	20	610	629	CGAUCUUGAGGCAGGAACUG	AAGUUCUUGCUGCAAGAUCG	Translation	starch binding domain containing protein, putative, expressed	1
osa-miR1861f	LOC_Os01g63810.1|13101.m06847|cDNA	3	20.214	1	20	666	685	CGAUCUUGAGGCAGGAACUG	AAGUUCUUGCUGCAAGAUCG	Translation	starch binding domain containing protein, putative, expressed	1
osa-miR1861f	LOC_Os05g51790.1|13105.m05600|cDNA	3	19.225	1	22	578	599	CGAUCUUGAGGCAGGAACUGAG	CCCAGUUUCUUCCUCAAGACCG	Cleavage	RecF/RecN/SMC N terminal domain containing protein, expressed	1
osa-miR1861f	LOC_Os05g51790.2|13105.m05601|cDNA	3	19.225	1	22	533	554	CGAUCUUGAGGCAGGAACUGAG	CCCAGUUUCUUCCUCAAGACCG	Cleavage	RecF/RecN/SMC N terminal domain containing protein, expressed	1
osa-miR1861h	LOC_Os05g51790.1|13105.m05600|cDNA	1.5	19.225	1	22	578	599	CGGUCUUGAGGCAGGAACUGAG	CCCAGUUUCUUCCUCAAGACCG	Cleavage	RecF/RecN/SMC N terminal domain containing protein, expressed	1
osa-miR1861h	LOC_Os05g51790.2|13105.m05601|cDNA	1.5	19.225	1	22	533	554	CGGUCUUGAGGCAGGAACUGAG	CCCAGUUUCUUCCUCAAGACCG	Cleavage	RecF/RecN/SMC N terminal domain containing protein, expressed	1
osa-miR1861h	LOC_Os09g09500.1|13109.m00819|cDNA	3	18.952	1	20	1805	1824	CGGUCUUGAGGCAGGAACUG	CAUUUCCUGCUUCAAGGCCA	Cleavage	lectin-like receptor kinase, putative	1
osa-miR1861h	LOC_Os01g03090.2|13101.m00260|cDNA	3	14.661	1	20	740	759	CGGUCUUGAGGCAGGAACUG	UAGUUCCUGCAUCACGACCG	Translation	methyltransferase, putative, expressed	1
osa-miR1861h	LOC_Os01g03090.1|13101.m00259|cDNA	3	14.661	1	20	1100	1119	CGGUCUUGAGGCAGGAACUG	UAGUUCCUGCAUCACGACCG	Translation	methyltransferase, putative, expressed	1
osa-miR1861i	LOC_Os01g63810.2|13101.m06848|cDNA	3	20.214	1	20	610	629	CGAUCUUGAGGCAGGAACUG	AAGUUCUUGCUGCAAGAUCG	Translation	starch binding domain containing protein, putative, expressed	1
osa-miR1861i	LOC_Os01g63810.1|13101.m06847|cDNA	3	20.214	1	20	666	685	CGAUCUUGAGGCAGGAACUG	AAGUUCUUGCUGCAAGAUCG	Translation	starch binding domain containing protein, putative, expressed	1
osa-miR1861i	LOC_Os05g51790.1|13105.m05600|cDNA	3	19.225	1	22	578	599	CGAUCUUGAGGCAGGAACUGAG	CCCAGUUUCUUCCUCAAGACCG	Cleavage	RecF/RecN/SMC N terminal domain containing protein, expressed	1
osa-miR1861i	LOC_Os05g51790.2|13105.m05601|cDNA	3	19.225	1	22	533	554	CGAUCUUGAGGCAGGAACUGAG	CCCAGUUUCUUCCUCAAGACCG	Cleavage	RecF/RecN/SMC N terminal domain containing protein, expressed	1
osa-miR1861j	LOC_Os05g51790.1|13105.m05600|cDNA	1.5	19.225	1	22	578	599	CGGUCUUGAGGCAGGAACUGAG	CCCAGUUUCUUCCUCAAGACCG	Cleavage	RecF/RecN/SMC N terminal domain containing protein, expressed	1
osa-miR1861j	LOC_Os05g51790.2|13105.m05601|cDNA	1.5	19.225	1	22	533	554	CGGUCUUGAGGCAGGAACUGAG	CCCAGUUUCUUCCUCAAGACCG	Cleavage	RecF/RecN/SMC N terminal domain containing protein, expressed	1
osa-miR1861j	LOC_Os09g09500.1|13109.m00819|cDNA	3	18.952	1	20	1805	1824	CGGUCUUGAGGCAGGAACUG	CAUUUCCUGCUUCAAGGCCA	Cleavage	lectin-like receptor kinase, putative	1
osa-miR1861j	LOC_Os01g03090.2|13101.m00260|cDNA	3	14.661	1	20	740	759	CGGUCUUGAGGCAGGAACUG	UAGUUCCUGCAUCACGACCG	Translation	methyltransferase, putative, expressed	1
osa-miR1861j	LOC_Os01g03090.1|13101.m00259|cDNA	3	14.661	1	20	1100	1119	CGGUCUUGAGGCAGGAACUG	UAGUUCCUGCAUCACGACCG	Translation	methyltransferase, putative, expressed	1
osa-miR1861k	LOC_Os01g63810.2|13101.m06848|cDNA	2.5	20.214	1	20	610	629	CGGUCUUGUGGCAAGAACUG	AAGUUCUUGCUGCAAGAUCG	Cleavage	starch binding domain containing protein, putative, expressed	1
osa-miR1861k	LOC_Os01g63810.1|13101.m06847|cDNA	2.5	20.214	1	20	666	685	CGGUCUUGUGGCAAGAACUG	AAGUUCUUGCUGCAAGAUCG	Cleavage	starch binding domain containing protein, putative, expressed	1
osa-miR1861k	LOC_Os06g44970.1|13106.m04727|cDNA	3	21.835	1	21	1696	1716	CGGUCUUGUGGCAAGAACUGA	UCAUUUCUUGUGGCAAGACCG	Translation	auxin efflux carrier component, putative, expressed	1
osa-miR1861k	LOC_Os03g18710.1|13103.m02240|cDNA	2.5	19.429	1	20	4045	4064	CGGUCUUGUGGCAAGAACUG	CAGUUCUUGCAAAGAGACCG	Translation	expressed protein	1
osa-miR1861l	LOC_Os01g63810.2|13101.m06848|cDNA	3	20.214	1	20	610	629	CGAUCUUGAGGCAGGAACUG	AAGUUCUUGCUGCAAGAUCG	Translation	starch binding domain containing protein, putative, expressed	1
osa-miR1861l	LOC_Os01g63810.1|13101.m06847|cDNA	3	20.214	1	20	666	685	CGAUCUUGAGGCAGGAACUG	AAGUUCUUGCUGCAAGAUCG	Translation	starch binding domain containing protein, putative, expressed	1
osa-miR1861l	LOC_Os05g51790.1|13105.m05600|cDNA	3	19.225	1	22	578	599	CGAUCUUGAGGCAGGAACUGAG	CCCAGUUUCUUCCUCAAGACCG	Cleavage	RecF/RecN/SMC N terminal domain containing protein, expressed	1
osa-miR1861l	LOC_Os05g51790.2|13105.m05601|cDNA	3	19.225	1	22	533	554	CGAUCUUGAGGCAGGAACUGAG	CCCAGUUUCUUCCUCAAGACCG	Cleavage	RecF/RecN/SMC N terminal domain containing protein, expressed	1
osa-miR1861m	LOC_Os01g63810.2|13101.m06848|cDNA	2.5	20.214	1	20	610	629	CGGUCUUGUGGCAAGAACUG	AAGUUCUUGCUGCAAGAUCG	Cleavage	starch binding domain containing protein, putative, expressed	1
osa-miR1861m	LOC_Os01g63810.1|13101.m06847|cDNA	2.5	20.214	1	20	666	685	CGGUCUUGUGGCAAGAACUG	AAGUUCUUGCUGCAAGAUCG	Cleavage	starch binding domain containing protein, putative, expressed	1
osa-miR1861m	LOC_Os06g44970.1|13106.m04727|cDNA	3	21.835	1	21	1696	1716	CGGUCUUGUGGCAAGAACUGA	UCAUUUCUUGUGGCAAGACCG	Translation	auxin efflux carrier component, putative, expressed	1
osa-miR1861m	LOC_Os03g18710.1|13103.m02240|cDNA	2.5	19.429	1	20	4045	4064	CGGUCUUGUGGCAAGAACUG	CAGUUCUUGCAAAGAGACCG	Translation	expressed protein	1
osa-miR1862e	LOC_Os02g30730.1|13102.m03358|cDNA	2	18.525	1	24	2707	2730	CUAGAUUUGUUUAUUUUGGGACGG	CUGUCCCAUAAAAAACAAAUCUAG	Cleavage	SART-1 family protein, putative, expressed	1
osa-miR1862e	LOC_Os02g30730.2|13102.m03359|cDNA	2	18.525	1	24	2783	2806	CUAGAUUUGUUUAUUUUGGGACGG	CUGUCCCAUAAAAAACAAAUCUAG	Cleavage	SART-1 family protein, putative, expressed	1
osa-miR1862e	LOC_Os03g51230.1|13103.m05569|cDNA	2.5	11.081	1	24	3071	3094	CUAGAUUUGUUUAUUUUGGGACGG	UCGUCCCAUAAAAAAUAAAUCUAG	Cleavage	SNF2 family N-terminal domain containing protein, expressed	1
osa-miR1862e	LOC_Os03g51230.2|13103.m05570|cDNA	2.5	11.081	1	24	3180	3203	CUAGAUUUGUUUAUUUUGGGACGG	UCGUCCCAUAAAAAAUAAAUCUAG	Cleavage	SNF2 family N-terminal domain containing protein, expressed	1
osa-miR1862e	LOC_Os03g52280.1|13103.m05693|cDNA	2.5	16.184	1	22	701	722	CUAGAUUUGUUUAUUUUGGGAC	GUUGCAAAAUAAACCAAUCUAG	Cleavage	expressed protein	1
osa-miR1862e	LOC_Os03g01920.1|13103.m00130|cDNA	3	15.495	1	22	1209	1230	CUAGAUUUGUUUAUUUUGGGAC	GUCCUGAAACAAACAAAUUUGG	Cleavage	expressed protein	1
osa-miR1863c	LOC_Os04g24700.1|13104.m02314|cDNA	2.5	15.938	1	21	713	733	UAGAAACUUGGCUGAUGCAUU	AAUGCAUCGGCAAUGUUUCUA	Translation	conserved hypothetical protein	1
osa-miR1863c	LOC_Os08g17610.1|13108.m01880|cDNA	3	15.664	1	20	819	838	UAGAAACUUGGCUGAUGCAU	AUGCAUCAGUUGAGUUUUUU	Cleavage	expressed protein	1
osa-miR1865-5p	LOC_Os01g41834.1|13101.m04293|cDNA	3	13.785	1	23	173	195	UGCUAGUGAUGGUGAUUCUUCGA	UUGAAGAGUCACUUUCACUAGCU	Translation	chalcone synthase, putative	1
osa-miR1865-5p	LOC_Os02g32900.1|13102.m03562|cDNA	2	23.932	1	21	190	210	UGCUAGUGAUGGUGAUUCUUC	GAAGAAUCCCCAUCAUUGGCA	Cleavage	expressed protein	1
osa-miR1865-5p	LOC_Os02g58160.1|13102.m06733|cDNA	3	21.629	1	22	286	308	UGCU-AGUGAUGGUGAUUCUUCG	UGGAGGAUCACCAUCACUCAGCA	Cleavage	expressed protein	1
osa-miR1865-5p	LOC_Os02g58160.2|13102.m06732|cDNA	3	21.629	1	22	354	376	UGCU-AGUGAUGGUGAUUCUUCG	UGGAGGAUCACCAUCACUCAGCA	Cleavage	expressed protein	1
osa-miR1865-5p	LOC_Os03g37610.1|13103.m04084|cDNA	2.5	24.584	1	24	169	192	UGCUAGUGAUGGUGAUUCUUCGAC	GGCAAACAAUCACCGUCACUAGUG	Cleavage	transposon protein, putative, CACTA, En/Spm sub-class	1
osa-miR1870-3p	LOC_Os01g17050.1|13101.m01911|cDNA	2.5	9.703	1	20	1004	1023	UUUAGGGCUAAUUCAGCAUG	UAUGCUUAAUUAGUUCUAAA	Cleavage	VQ domain containing protein, putative, expressed	1
osa-miR1874-3p	LOC_Os02g20950.1|13102.m02348|cDNA	1	17.595	1	24	446	469	UAUGGAUGGAGGUGUAACCCGAUG	CGUUGGGUUACACUUCCGUCCAUA	Cleavage	expressed protein	1
osa-miR1874-5p	LOC_Os05g18774.2|13105.m01984|cDNA	3	21.853	1	23	596	618	UAGGGCUACUACACCAUCCAUAA	UUGUGGAUGCUGUACUAGCUUUA	Translation	protein phosphatase 1 regulatory subunit 11, putative, expressed	1
osa-miR1874-5p	LOC_Os05g18774.1|13105.m01983|cDNA	3	21.853	1	23	606	628	UAGGGCUACUACACCAUCCAUAA	UUGUGGAUGCUGUACUAGCUUUA	Translation	protein phosphatase 1 regulatory subunit 11, putative, expressed	1
osa-miR1874-5p	LOC_Os05g18774.3|13105.m01982|cDNA	3	21.853	1	23	701	723	UAGGGCUACUACACCAUCCAUAA	UUGUGGAUGCUGUACUAGCUUUA	Translation	protein phosphatase 1 regulatory subunit 11, putative, expressed	1
osa-miR1874-5p	LOC_Os10g04290.1|13110.m00347|cDNA	3	20.969	1	22	1470	1491	UAGGGCUACUACACCAUCCAUA	UAUGGAUGCUGCAGUAGCUUUA	Translation	transposon protein, putative, CACTA, En/Spm sub-class	1
osa-miR1874-5p	LOC_Os08g28410.1|13108.m02934|cDNA	3	21.025	1	23	2	24	UAGGGCUACUACACCAUCCAUAA	UGGUGGAUGGUGUGGUGACCUUA	Cleavage	retinal pigment epithelial membrane protein, expressed	1
osa-miR1876	LOC_Os09g21670.1|13109.m02076|cDNA	3	15.451	1	22	696	717	AUAAGUGGGUUUGUGGGCUGGC	GCUAUCACAUAAACCCACUUAU	Cleavage	expressed protein	1
osa-miR1880	LOC_Os05g34770.1|13105.m03622|cDNA	3	20.63	1	20	208	227	UUCCAAGCGGGCCACUUAAG	CUUGAAUGGUCUGUUUGGAA	Cleavage	cytochrome c, putative, expressed	1
osa-miR1880	LOC_Os02g04090.1|13102.m00410|cDNA	2.5	20.581	1	20	864	883	UUCCAAGCGGGCCACUUAAG	CAUAAGUGGCGCGCUUGGGA	Translation	retrotransposon protein, putative, unclassified	1
osa-miR1880	LOC_Os06g49420.2|13106.m05286|cDNA	2.5	22.55	1	20	1744	1763	UUCCAAGCGGGCCACUUAAG	CAUAAGUGGCGCGCUUGGGA	Translation	retrotransposon protein, putative, unclassified, expressed	1
osa-miR1881	LOC_Os03g15590.1|13103.m01826|cDNA	3	14.602	1	22	545	566	AAUGUUAUUGUAGCGUGGUGGU	ACCACCAGGCUGUGAUGACAUU	Cleavage	eukaryotic translation initiation factor, putative, expressed	1
osa-miR1881	LOC_Os04g46890.1|13104.m04735|cDNA	2	7.426	1	24	509	532	AAUGUUAUUGUAGCGUGGUGGUGU	AAAACACAACGUUACAAUGACAUU	Cleavage	pre-mRNA-processing factor 31, putative, expressed	1
osa-miR1881	LOC_Os04g46890.2|13104.m04734|cDNA	2	7.426	1	24	509	532	AAUGUUAUUGUAGCGUGGUGGUGU	AAAACACAACGUUACAAUGACAUU	Cleavage	pre-mRNA-processing factor 31, putative, expressed	1
osa-miR1881	LOC_Os04g46890.3|13104.m04736|cDNA	2	7.426	1	24	509	532	AAUGUUAUUGUAGCGUGGUGGUGU	AAAACACAACGUUACAAUGACAUU	Cleavage	pre-mRNA-processing factor 31, putative, expressed	1
osa-miR1881	LOC_Os08g43120.1|13108.m04668|cDNA	2.5	15.694	1	23	505	527	AAUGUUAUUGUAGCGUGGUGGUG	CUUCACCAUGCUGAAAUGACAUU	Translation	Plant PDR ABC transporter associated domain containing protein, expressed	1
osa-miR1882a	LOC_Os03g02010.2|13103.m00142|cDNA	2.5	18.045	1	24	397	420	AGAUUGCUUUCAAGGUCAUUUCUU	AAGAAAUGAUCUUGAAAGCGAUUA	Cleavage	DNA methyltransferase protein, putative, expressed	1
osa-miR1882a	LOC_Os03g02010.1|13103.m00143|cDNA	2.5	20.32	1	24	397	420	AGAUUGCUUUCAAGGUCAUUUCUU	AAGAAAUGAUCUUGAAAGCGAUUA	Cleavage	DNA methyltransferase protein, putative, expressed	1
osa-miR1882a	LOC_Os03g02010.3|13103.m00141|cDNA	2.5	18.045	1	24	397	420	AGAUUGCUUUCAAGGUCAUUUCUU	AAGAAAUGAUCUUGAAAGCGAUUA	Cleavage	DNA methyltransferase protein, putative, expressed	1
osa-miR1882a	LOC_Os03g02010.4|13103.m00144|cDNA	2.5	20.32	1	24	397	420	AGAUUGCUUUCAAGGUCAUUUCUU	AAGAAAUGAUCUUGAAAGCGAUUA	Cleavage	DNA methyltransferase protein, putative, expressed	1
osa-miR1882a	LOC_Os04g26490.1|13104.m02508|cDNA	2.5	16.378	1	24	3429	3452	AGAUUGCUUUCAAGGUCAUUUCUU	AACAAAUGGCUUGGAAAGUAAUCU	Cleavage	expressed protein	1
osa-miR1882b	LOC_Os03g02010.2|13103.m00142|cDNA	2.5	18.045	1	24	397	420	AGAUUGCUUUCAAGGUCAUUUCUU	AAGAAAUGAUCUUGAAAGCGAUUA	Cleavage	DNA methyltransferase protein, putative, expressed	1
osa-miR1882b	LOC_Os03g02010.1|13103.m00143|cDNA	2.5	20.32	1	24	397	420	AGAUUGCUUUCAAGGUCAUUUCUU	AAGAAAUGAUCUUGAAAGCGAUUA	Cleavage	DNA methyltransferase protein, putative, expressed	1
osa-miR1882b	LOC_Os03g02010.3|13103.m00141|cDNA	2.5	18.045	1	24	397	420	AGAUUGCUUUCAAGGUCAUUUCUU	AAGAAAUGAUCUUGAAAGCGAUUA	Cleavage	DNA methyltransferase protein, putative, expressed	1
osa-miR1882b	LOC_Os03g02010.4|13103.m00144|cDNA	2.5	20.32	1	24	397	420	AGAUUGCUUUCAAGGUCAUUUCUU	AAGAAAUGAUCUUGAAAGCGAUUA	Cleavage	DNA methyltransferase protein, putative, expressed	1
osa-miR1882b	LOC_Os04g26490.1|13104.m02508|cDNA	2.5	16.378	1	24	3429	3452	AGAUUGCUUUCAAGGUCAUUUCUU	AACAAAUGGCUUGGAAAGUAAUCU	Cleavage	expressed protein	1
osa-miR1882c	LOC_Os03g02010.2|13103.m00142|cDNA	2.5	18.045	1	24	397	420	AGAUUGCUUUCAAGGUCAUUUCUU	AAGAAAUGAUCUUGAAAGCGAUUA	Cleavage	DNA methyltransferase protein, putative, expressed	1
osa-miR1882c	LOC_Os03g02010.1|13103.m00143|cDNA	2.5	20.32	1	24	397	420	AGAUUGCUUUCAAGGUCAUUUCUU	AAGAAAUGAUCUUGAAAGCGAUUA	Cleavage	DNA methyltransferase protein, putative, expressed	1
osa-miR1882c	LOC_Os03g02010.3|13103.m00141|cDNA	2.5	18.045	1	24	397	420	AGAUUGCUUUCAAGGUCAUUUCUU	AAGAAAUGAUCUUGAAAGCGAUUA	Cleavage	DNA methyltransferase protein, putative, expressed	1
osa-miR1882c	LOC_Os03g02010.4|13103.m00144|cDNA	2.5	20.32	1	24	397	420	AGAUUGCUUUCAAGGUCAUUUCUU	AAGAAAUGAUCUUGAAAGCGAUUA	Cleavage	DNA methyltransferase protein, putative, expressed	1
osa-miR1882c	LOC_Os04g26490.1|13104.m02508|cDNA	2.5	16.378	1	24	3429	3452	AGAUUGCUUUCAAGGUCAUUUCUU	AACAAAUGGCUUGGAAAGUAAUCU	Cleavage	expressed protein	1
osa-miR1882d	LOC_Os03g02010.2|13103.m00142|cDNA	2.5	18.045	1	24	397	420	AGAUUGCUUUCAAGGUCAUUUCUU	AAGAAAUGAUCUUGAAAGCGAUUA	Cleavage	DNA methyltransferase protein, putative, expressed	1
osa-miR1882d	LOC_Os03g02010.1|13103.m00143|cDNA	2.5	20.32	1	24	397	420	AGAUUGCUUUCAAGGUCAUUUCUU	AAGAAAUGAUCUUGAAAGCGAUUA	Cleavage	DNA methyltransferase protein, putative, expressed	1
osa-miR1882d	LOC_Os03g02010.3|13103.m00141|cDNA	2.5	18.045	1	24	397	420	AGAUUGCUUUCAAGGUCAUUUCUU	AAGAAAUGAUCUUGAAAGCGAUUA	Cleavage	DNA methyltransferase protein, putative, expressed	1
osa-miR1882d	LOC_Os03g02010.4|13103.m00144|cDNA	2.5	20.32	1	24	397	420	AGAUUGCUUUCAAGGUCAUUUCUU	AAGAAAUGAUCUUGAAAGCGAUUA	Cleavage	DNA methyltransferase protein, putative, expressed	1
osa-miR1882d	LOC_Os04g26490.1|13104.m02508|cDNA	2.5	16.378	1	24	3429	3452	AGAUUGCUUUCAAGGUCAUUUCUU	AACAAAUGGCUUGGAAAGUAAUCU	Cleavage	expressed protein	1
osa-miR1882e	LOC_Os03g02010.2|13103.m00142|cDNA	2.5	18.045	1	24	397	420	AGAUUGCUUUCAAGGUCAUUUCUU	AAGAAAUGAUCUUGAAAGCGAUUA	Cleavage	DNA methyltransferase protein, putative, expressed	1
osa-miR1882e	LOC_Os03g02010.1|13103.m00143|cDNA	2.5	20.32	1	24	397	420	AGAUUGCUUUCAAGGUCAUUUCUU	AAGAAAUGAUCUUGAAAGCGAUUA	Cleavage	DNA methyltransferase protein, putative, expressed	1
osa-miR1882e	LOC_Os03g02010.3|13103.m00141|cDNA	2.5	18.045	1	24	397	420	AGAUUGCUUUCAAGGUCAUUUCUU	AAGAAAUGAUCUUGAAAGCGAUUA	Cleavage	DNA methyltransferase protein, putative, expressed	1
osa-miR1882e	LOC_Os03g02010.4|13103.m00144|cDNA	2.5	20.32	1	24	397	420	AGAUUGCUUUCAAGGUCAUUUCUU	AAGAAAUGAUCUUGAAAGCGAUUA	Cleavage	DNA methyltransferase protein, putative, expressed	1
osa-miR1882e	LOC_Os04g26490.1|13104.m02508|cDNA	2.5	16.378	1	24	3429	3452	AGAUUGCUUUCAAGGUCAUUUCUU	AACAAAUGGCUUGGAAAGUAAUCU	Cleavage	expressed protein	1
osa-miR1882f	LOC_Os03g02010.2|13103.m00142|cDNA	2.5	18.045	1	24	397	420	AGAUUGCUUUCAAGGUCAUUUCUU	AAGAAAUGAUCUUGAAAGCGAUUA	Cleavage	DNA methyltransferase protein, putative, expressed	1
osa-miR1882f	LOC_Os03g02010.1|13103.m00143|cDNA	2.5	20.32	1	24	397	420	AGAUUGCUUUCAAGGUCAUUUCUU	AAGAAAUGAUCUUGAAAGCGAUUA	Cleavage	DNA methyltransferase protein, putative, expressed	1
osa-miR1882f	LOC_Os03g02010.3|13103.m00141|cDNA	2.5	18.045	1	24	397	420	AGAUUGCUUUCAAGGUCAUUUCUU	AAGAAAUGAUCUUGAAAGCGAUUA	Cleavage	DNA methyltransferase protein, putative, expressed	1
osa-miR1882f	LOC_Os03g02010.4|13103.m00144|cDNA	2.5	20.32	1	24	397	420	AGAUUGCUUUCAAGGUCAUUUCUU	AAGAAAUGAUCUUGAAAGCGAUUA	Cleavage	DNA methyltransferase protein, putative, expressed	1
osa-miR1882f	LOC_Os04g26490.1|13104.m02508|cDNA	2.5	16.378	1	24	3429	3452	AGAUUGCUUUCAAGGUCAUUUCUU	AACAAAUGGCUUGGAAAGUAAUCU	Cleavage	expressed protein	1
osa-miR1882g	LOC_Os03g02010.2|13103.m00142|cDNA	2.5	18.045	1	24	397	420	AGAUUGCUUUCAAGGUCAUUUCUU	AAGAAAUGAUCUUGAAAGCGAUUA	Cleavage	DNA methyltransferase protein, putative, expressed	1
osa-miR1882g	LOC_Os03g02010.1|13103.m00143|cDNA	2.5	20.32	1	24	397	420	AGAUUGCUUUCAAGGUCAUUUCUU	AAGAAAUGAUCUUGAAAGCGAUUA	Cleavage	DNA methyltransferase protein, putative, expressed	1
osa-miR1882g	LOC_Os03g02010.3|13103.m00141|cDNA	2.5	18.045	1	24	397	420	AGAUUGCUUUCAAGGUCAUUUCUU	AAGAAAUGAUCUUGAAAGCGAUUA	Cleavage	DNA methyltransferase protein, putative, expressed	1
osa-miR1882g	LOC_Os03g02010.4|13103.m00144|cDNA	2.5	20.32	1	24	397	420	AGAUUGCUUUCAAGGUCAUUUCUU	AAGAAAUGAUCUUGAAAGCGAUUA	Cleavage	DNA methyltransferase protein, putative, expressed	1
osa-miR1882g	LOC_Os04g26490.1|13104.m02508|cDNA	2.5	16.378	1	24	3429	3452	AGAUUGCUUUCAAGGUCAUUUCUU	AACAAAUGGCUUGGAAAGUAAUCU	Cleavage	expressed protein	1
osa-miR1882h	LOC_Os03g02010.2|13103.m00142|cDNA	2.5	18.045	1	24	397	420	AGAUUGCUUUCAAGGUCAUUUCUU	AAGAAAUGAUCUUGAAAGCGAUUA	Cleavage	DNA methyltransferase protein, putative, expressed	1
osa-miR1882h	LOC_Os03g02010.1|13103.m00143|cDNA	2.5	20.32	1	24	397	420	AGAUUGCUUUCAAGGUCAUUUCUU	AAGAAAUGAUCUUGAAAGCGAUUA	Cleavage	DNA methyltransferase protein, putative, expressed	1
osa-miR1882h	LOC_Os03g02010.3|13103.m00141|cDNA	2.5	18.045	1	24	397	420	AGAUUGCUUUCAAGGUCAUUUCUU	AAGAAAUGAUCUUGAAAGCGAUUA	Cleavage	DNA methyltransferase protein, putative, expressed	1
osa-miR1882h	LOC_Os03g02010.4|13103.m00144|cDNA	2.5	20.32	1	24	397	420	AGAUUGCUUUCAAGGUCAUUUCUU	AAGAAAUGAUCUUGAAAGCGAUUA	Cleavage	DNA methyltransferase protein, putative, expressed	1
osa-miR1882h	LOC_Os04g26490.1|13104.m02508|cDNA	2.5	16.378	1	24	3429	3452	AGAUUGCUUUCAAGGUCAUUUCUU	AACAAAUGGCUUGGAAAGUAAUCU	Cleavage	expressed protein	1
osa-miR1883a	LOC_Os04g13630.1|13104.m01252|cDNA	3	23.231	1	20	48	67	ACCUGUGACGGGCCGAGAAU	UGUAUCGGCCCGUCACAGGU	Cleavage	transposon protein, putative, CACTA, En/Spm sub-class	1
osa-miR1883b	LOC_Os04g13630.1|13104.m01252|cDNA	3	23.231	1	20	48	67	ACCUGUGACGGGCCGAGAAU	UGUAUCGGCCCGUCACAGGU	Cleavage	transposon protein, putative, CACTA, En/Spm sub-class	1
osa-miR2880	LOC_Os08g37360.1|13108.m03931|cDNA	2.5	20.775	1	24	319	342	ACGGUAUCCCGUUCGGACAGGAUG	CAUUCUGUCCUAACGGGAUUCCGU	Cleavage	hypothetical protein	1
osa-miR2880	LOC_Os03g40920.1|13103.m04410|cDNA	3	23.009	1	24	1333	1356	ACGGUAUCCCGUUCGGACAGGAUG	CAUCCCGUCUGAACGGGAAACCGU	Cleavage	expressed protein	1
osa-miR2880	LOC_Os01g63830.1|13101.m06851|cDNA	3	13.32	1	23	204	226	ACGGUAUCCCGUUCGGACAGGAU	AUACCGUUCGAACGAGAUAUCGU	Translation	dehydrodolichyl diphosphate synthase, putative, expressed	1
osa-miR2880	LOC_Os04g58390.1|13104.m06130|cDNA	3	22.21	1	23	1396	1418	ACGGUAUCCCGUUCGGACAGGAU	GUGCUGUUCUGCCGGGAUACCGU	Cleavage	allantoinase, putative, expressed	1
osa-miR396f	LOC_Os06g10310.1|13106.m01116|cDNA	1	17.97	1	21	423	443	UCCACAGGCUUUCUUGAACUG	CCGUUCAAGAAAGCCUGUGGA	Cleavage	growth regulating factor protein, putative, expressed	1
osa-miR396f	LOC_Os06g02560.2|13106.m00187|cDNA	1	17.86	1	21	605	625	UCCACAGGCUUUCUUGAACUG	CCGUUCAAGAAAGCCUGUGGA	Cleavage	growth-regulating factor, putative, expressed	1
osa-miR396f	LOC_Os04g51190.3|13104.m05211|cDNA	1	20.242	1	21	535	555	UCCACAGGCUUUCUUGAACUG	CCGUUCAAGAAAGCCUGUGGA	Cleavage	growth-regulating factor, putative, expressed	1
osa-miR396f	LOC_Os04g51190.1|13104.m05212|cDNA	1	20.242	1	21	535	555	UCCACAGGCUUUCUUGAACUG	CCGUUCAAGAAAGCCUGUGGA	Cleavage	growth-regulating factor, putative, expressed	1
osa-miR396f	LOC_Os04g51190.2|13104.m05213|cDNA	1	20.242	1	21	535	555	UCCACAGGCUUUCUUGAACUG	CCGUUCAAGAAAGCCUGUGGA	Cleavage	growth-regulating factor, putative, expressed	1
osa-miR396f	LOC_Os02g47280.2|13102.m05320|cDNA	1	24.559	1	21	570	590	UCCACAGGCUUUCUUGAACUG	CCGUUCAAGAAAGCCUGUGGA	Cleavage	growth-regulating factor, putative, expressed	1
osa-miR396f	LOC_Os06g02560.3|13106.m00185|cDNA	1	17.86	1	21	625	645	UCCACAGGCUUUCUUGAACUG	CCGUUCAAGAAAGCCUGUGGA	Cleavage	growth-regulating factor, putative, expressed	1
osa-miR396f	LOC_Os06g02560.1|13106.m00186|cDNA	1	17.86	1	21	605	625	UCCACAGGCUUUCUUGAACUG	CCGUUCAAGAAAGCCUGUGGA	Cleavage	growth-regulating factor, putative, expressed	1
osa-miR396f	LOC_Os02g47280.1|13102.m05321|cDNA	1	24.559	1	21	667	687	UCCACAGGCUUUCUUGAACUG	CCGUUCAAGAAAGCCUGUGGA	Cleavage	growth-regulating factor, putative, expressed	1
osa-miR396f	LOC_Os02g53690.1|13102.m06134|cDNA	1	17.56	1	21	570	590	UCCACAGGCUUUCUUGAACUG	CCGUUCAAGAAAGCCUGUGGA	Cleavage	growth regulating factor protein, putative, expressed	1
osa-miR396f	LOC_Os03g47140.1|13103.m05075|cDNA	1	14.61	1	21	947	967	UCCACAGGCUUUCUUGAACUG	CCGUUCAAGAAAGCCUGUGGA	Cleavage	growth regulating factor protein, putative, expressed	1
osa-miR396f	LOC_Os04g24190.1|13104.m02254|cDNA	2	24.31	1	20	828	847	UCCACAGGCUUUCUUGAACU	CUUUCAAGAAAGCCUGUGGA	Cleavage	growth-regulating factor 11, putative	1
osa-miR396f	LOC_Os04g48510.1|13104.m04940|cDNA	2.5	20.501	1	21	858	878	UCCACAGGCUUUCUUGAACUG	CCGUUCAAGAAAGCCUAUGGA	Cleavage	growth regulating factor protein, putative, expressed	1
osa-miR396f	LOC_Os03g51970.1|13103.m05661|cDNA	2.5	24.155	1	21	419	439	UCCACAGGCUUUCUUGAACUG	CCGUUCAAGAAAGCAUGUGGA	Cleavage	growth-regulating factor, putative, expressed	1
osa-miR396f	LOC_Os12g29980.2|13112.m03052|cDNA	2.5	15.862	1	21	732	752	UCCACAGGCUUUCUUGAACUG	CCGUUCAAGAAAGCAUGUGGA	Cleavage	growth regulating factor protein, putative, expressed	1
osa-miR396f	LOC_Os12g29980.1|13112.m03051|cDNA	2.5	15.862	1	21	774	794	UCCACAGGCUUUCUUGAACUG	CCGUUCAAGAAAGCAUGUGGA	Cleavage	growth regulating factor protein, putative, expressed	1
osa-miR396f	LOC_Os01g25330.1|13101.m02683|cDNA	2.5	19.535	1	21	1038	1058	UCCACAGGCUUUCUUGAACUG	CAGUUCAGGAAAUUUUGUGGA	Translation	SAC9, putative, expressed	1
osa-miR396f	LOC_Os01g25330.3|13101.m02684|cDNA	2.5	19.535	1	21	1038	1058	UCCACAGGCUUUCUUGAACUG	CAGUUCAGGAAAUUUUGUGGA	Translation	SAC9, putative, expressed	1
osa-miR396f	LOC_Os01g25330.2|13101.m02685|cDNA	2.5	19.535	1	21	1038	1058	UCCACAGGCUUUCUUGAACUG	CAGUUCAGGAAAUUUUGUGGA	Translation	SAC9, putative, expressed	1
osa-miR396f	LOC_Os11g35030.1|13111.m03408|cDNA	2.5	22.719	1	20	870	889	UCCACAGGCUUUCUUGAACU	CGUUCAAGAAAGCAUGUGGA	Cleavage	growth regulating factor protein, putative, expressed	1
osa-miR396f	LOC_Os11g35030.2|13111.m03407|cDNA	2.5	22.719	1	20	1557	1576	UCCACAGGCUUUCUUGAACU	CGUUCAAGAAAGCAUGUGGA	Cleavage	growth regulating factor protein, putative, expressed	1
osa-miR397b	LOC_Os05g38410.1|13105.m04028|cDNA	1	17.731	1	22	743	764	UUGAGUGCAGCGUUGAUGAACC	GGCUCAUCAACGCUGCACUCAA	Cleavage	laccase precursor protein, putative, expressed	1
osa-miR397b	LOC_Os05g38420.1|13105.m04029|cDNA	1	17.731	1	22	743	764	UUGAGUGCAGCGUUGAUGAACC	GGCUCAUCAACGCUGCACUCAA	Cleavage	laccase precursor protein, putative, expressed	1
osa-miR397b	LOC_Os12g15680.1|13112.m01654|cDNA	1.5	12.914	1	22	745	766	UUGAGUGCAGCGUUGAUGAACC	GGAUCAUCAACGCUGCGCUCAA	Cleavage	laccase precursor protein, putative, expressed	1
osa-miR397b	LOC_Os01g62490.1|13101.m06696|cDNA	1.5	22.233	1	22	757	778	UUGAGUGCAGCGUUGAUGAACC	GGCUCAUCAACGCUGCGCUCAA	Cleavage	laccase precursor protein, putative, expressed	1
osa-miR397b	LOC_Os01g63180.1|13101.m06776|cDNA	1.5	17.29	1	22	1084	1105	UUGAGUGCAGCGUUGAUGAACC	GGAUCAUCAACGCUGCGCUCAA	Cleavage	laccase-6 precursor, putative, expressed	1
osa-miR397b	LOC_Os01g44330.1|13101.m04596|cDNA	2.5	13.923	1	22	677	698	UUGAGUGCAGCGUUGAUGAACC	GGAUCAUCAACGCUGCAGUCAA	Cleavage	laccase precursor protein, putative, expressed	1
osa-miR397b	LOC_Os01g63190.3|13101.m06778|cDNA	2.5	18.268	1	22	724	745	UUGAGUGCAGCGUUGAUGAACC	GGGUCAUCAACGCUGGACUCAA	Cleavage	laccase precursor protein, putative, expressed	1
osa-miR397b	LOC_Os01g63190.1|13101.m06777|cDNA	2.5	18.147	1	22	750	771	UUGAGUGCAGCGUUGAUGAACC	GGGUCAUCAACGCUGGACUCAA	Cleavage	laccase precursor protein, putative, expressed	1
osa-miR397b	LOC_Os11g48060.1|13111.m04803|cDNA	2.5	14.39	1	22	1176	1197	UUGAGUGCAGCGUUGAUGAACC	GGAUCAUCAACGCUGCACUGAA	Cleavage	laccase-22 precursor, putative, expressed	1
osa-miR397b	LOC_Os11g01730.1|13111.m00087|cDNA	1.5	14.634	1	22	668	689	UUGAGUGCAGCGUUGAUGAACC	GCUUCAUCAACGCCGCGCUCAA	Translation	laccase-23 precursor, putative, expressed	1
osa-miR397b	LOC_Os12g01730.1|13112.m00089|cDNA	1.5	14.284	1	22	795	816	UUGAGUGCAGCGUUGAUGAACC	GCUUCAUCAACGCCGCGCUCAA	Translation	laccase-23 precursor, putative, expressed	1
osa-miR397b	LOC_Os03g16610.1|13103.m01973|cDNA	2.5	17.447	1	22	777	798	UUGAGUGCAGCGUUGAUGAACC	GGCUGAUCAACGCUGCGCUCAA	Cleavage	laccase precursor protein, putative, expressed	1
osa-miR397b	LOC_Os12g15530.1|13112.m01638|cDNA	2.5	23.294	1	22	792	813	UUGAGUGCAGCGUUGAUGAACC	GGAUCAUCAACGCCGCGCUCAA	Translation	retrotransposon protein, putative, unclassified, expressed	1
osa-miR397b	LOC_Os05g35770.1|13105.m03749|cDNA	2.5	20.649	1	20	447	466	UUGAGUGCAGCGUUGAUGAA	GUCAUCAAUGUUGCAUUCAA	Cleavage	serine/threonine-protein kinase SAPK4, putative	1
osa-miR397b	LOC_Os01g63200.1|13101.m06780|cDNA	2.5	19.305	1	20	664	683	UUGAGUGCAGCGUUGAUGAA	AUCAUCAACGCUGCAGUCAA	Cleavage	laccase precursor protein, putative, expressed	1
osa-miR397b	LOC_Os04g54410.1|13104.m05626|cDNA	3	16.416	1	21	2072	2092	UUGAGUGCAGCGUUGAUGAAC	GUUCAUCAAUGUAGUAUUCAA	Translation	expressed protein	1
osa-miR397b	LOC_Os02g34600.1|13102.m03749|cDNA	2.5	20.257	1	20	633	652	UUGAGUGCAGCGUUGAUGAA	GUCAUCACUGCUGCACUCAA	Cleavage	CAMK_CAMK_like.13 - CAMK includes calcium/calmodulin depedent protein kinases, expressed	1
osa-miR397b	LOC_Os02g34600.2|13102.m12407|cDNA	2.5	20.257	1	20	633	652	UUGAGUGCAGCGUUGAUGAA	GUCAUCACUGCUGCACUCAA	Cleavage	CAMK_CAMK_like.13 - CAMK includes calcium/calmodulin depedent protein kinases, expressed	1
osa-miR397b	LOC_Os01g62480.1|13101.m06695|cDNA	2.5	15.671	1	20	791	810	UUGAGUGCAGCGUUGAUGAA	CUCAUCAACGCCGCGCUCAA	Translation	laccase precursor protein, putative, expressed	1
osa-miR435	LOC_Os07g41730.2|13107.m10030|cDNA	3	20.53	1	20	677	696	UUAUCCGGUAUUGGAGUUGA	UCAGCUCUAAUACUGGAAAA	Cleavage	OsPOP16 - Putative Prolyl Oligopeptidase homologue, expressed	1
osa-miR435	LOC_Os07g41730.1|13107.m04354|cDNA	3	20.53	1	20	677	696	UUAUCCGGUAUUGGAGUUGA	UCAGCUCUAAUACUGGAAAA	Cleavage	OsPOP16 - Putative Prolyl Oligopeptidase homologue, expressed	1
osa-miR435	LOC_Os01g36790.1|13101.m03725|cDNA	3	13.938	1	20	773	792	UUAUCCGGUAUUGGAGUUGA	UCAACUCCACUGCCGGAUCA	Translation	TKL_IRAK_DUF26-lf.2 - DUF26 kinases have homology to DUF26 containing loci, expressed	1
osa-miR435	LOC_Os07g41320.1|13107.m04299|cDNA	3	16.464	1	20	1086	1106	UUAUCCGGUA-UUGGAGUUGA	UCAACUUCAACUACCGGAUGA	Translation	COBRA-like protein precursor, putative, expressed	1
osa-miR435	LOC_Os09g09290.2|13109.m00795|cDNA	3	11.479	1	20	1492	1512	UUAUCCGGUAUUGG-AGUUGA	UCAACUAUCAAUACUGGAUAA	Cleavage	retrotransposon protein, putative, unclassified, expressed	1
osa-miR435	LOC_Os09g09290.1|13109.m00794|cDNA	3	11.479	1	20	2396	2416	UUAUCCGGUAUUGG-AGUUGA	UCAACUAUCAAUACUGGAUAA	Cleavage	retrotransposon protein, putative, unclassified, expressed	1
osa-miR439d	LOC_Os03g36540.1|13103.m03991|cDNA	3	16.592	1	21	1092	1112	UAUCCCUGUCGAACCGCGGUU	GAGCUCGGUUCGACAGGGAUC	Cleavage	magnesium-chelatase subunit chlI, chloroplast precursor, putative, expressed	1
osa-miR439d	LOC_Os03g36540.2|13103.m12991|cDNA	3	19.112	1	21	985	1005	UAUCCCUGUCGAACCGCGGUU	GAGCUCGGUUCGACAGGGAUC	Cleavage	magnesium-chelatase subunit chlI, chloroplast precursor, putative, expressed	1
osa-miR439g	LOC_Os03g36540.1|13103.m03991|cDNA	3	16.592	1	21	1092	1112	UAUCCCUGUCGAACCGCGGUU	GAGCUCGGUUCGACAGGGAUC	Cleavage	magnesium-chelatase subunit chlI, chloroplast precursor, putative, expressed	1
osa-miR439g	LOC_Os03g36540.2|13103.m12991|cDNA	3	19.112	1	21	985	1005	UAUCCCUGUCGAACCGCGGUU	GAGCUCGGUUCGACAGGGAUC	Cleavage	magnesium-chelatase subunit chlI, chloroplast precursor, putative, expressed	1
osa-miR811a	LOC_Os06g06150.1|13106.m00625|cDNA	2.5	19.347	1	22	39	60	AUCGAGAAAUGGACGUCCGAGA	UCUCGACCGUCCGUUUCUCGAU	Cleavage	zinc finger, C3HC4 type domain containing protein, expressed	1
osa-miR811a	LOC_Os09g23560.1|13109.m02227|cDNA	3	19.777	1	22	1494	1515	AUCGAGAAAUGGACGUCCGAGA	UCUCGAACAUUUAUUUCUCGAU	Cleavage	dehydrogenase, putative, expressed	1
osa-miR811a	LOC_Os12g10410.1|13112.m01100|cDNA	3	14.652	1	22	3198	3219	AUCGAGAAAUGGACGUCCGAGA	UCUCAGAUGUACAUUUUUCGAU	Cleavage	NB-ARC/LRR disease resistance protein, putative, expressed	1
osa-miR811b	LOC_Os06g06150.1|13106.m00625|cDNA	2.5	19.347	1	22	39	60	AUCGAGAAAUGGACGUCCGAGA	UCUCGACCGUCCGUUUCUCGAU	Cleavage	zinc finger, C3HC4 type domain containing protein, expressed	1
osa-miR811b	LOC_Os09g23560.1|13109.m02227|cDNA	3	19.777	1	22	1494	1515	AUCGAGAAAUGGACGUCCGAGA	UCUCGAACAUUUAUUUCUCGAU	Cleavage	dehydrogenase, putative, expressed	1
osa-miR811b	LOC_Os12g10410.1|13112.m01100|cDNA	3	14.652	1	22	3198	3219	AUCGAGAAAUGGACGUCCGAGA	UCUCAGAUGUACAUUUUUCGAU	Cleavage	NB-ARC/LRR disease resistance protein, putative, expressed	1
osa-miR812f	LOC_Os02g07960.4|13102.m00917|cDNA	1.5	13.368	1	24	3481	3504	ACGGAUGAUUAAAGUUGGACACGG	CCGUGCCCAACUUUAAUCGUCCGU	Cleavage	STRUBBELIG-RECEPTOR FAMILY 3 precursor, putative, expressed	1
osa-miR812f	LOC_Os02g53180.2|13102.m06065|cDNA	1	13.961	1	24	1365	1388	ACGGAUGAUUAAAGUUGGACACGG	CCGCGUCCAACUUUGAUCGUCCGU	Cleavage	1-aminocyclopropane-1-carboxylate oxidase protein, putative, expressed	1
osa-miR812f	LOC_Os06g38210.2|13106.m10484|cDNA	2.5	13.54	1	24	2504	2527	ACGGAUGAUUAAAGUUGGACACGG	CCGUGUCCAACUUUGACUGUCCGU	Cleavage	expressed protein	1
osa-miR812f	LOC_Os03g12610.1|13103.m01444|cDNA	2.5	9.24	1	24	2101	2124	ACGGAUGAUUAAAGUUGGACACGG	UCGUGUCCAACUUUGACUGUCCGU	Cleavage	DNA polymerase I, putative, expressed	1
osa-miR812f	LOC_Os03g50620.1|13103.m05508|cDNA	2	9.36	1	24	1112	1135	ACGGAUGAUUAAAGUUGGACACGG	CCGCGUUCAACUUUGACCAUCCGU	Cleavage	ATP binding protein, putative, expressed	1
osa-miR812f	LOC_Os06g50146.1|13106.m05387|cDNA	3	14.63	1	24	1236	1259	ACGGAUGAUUAAAGUUGGACACGG	UCGUGUCCAACUUUAACGGUCCGU	Cleavage	calcium-dependent protein kinase CPK1 adapter protein 2, putative, expressed	1
osa-miR812f	LOC_Os01g52790.1|13101.m05529|cDNA	3	11.286	1	24	2017	2040	ACGGAUGAUUAAAGUUGGACACGG	UUGUGUCUAACUUUGAUCGCCCGU	Cleavage	cytochrome P450 72A1, putative, expressed	1
osa-miR812f	LOC_Os02g07960.3|13102.m00916|cDNA	2	11.001	1	24	3638	3661	ACGGAUGAUUAAAGUUGGACACGG	UUGCGUCCAACUUUAAUCGACCGU	Cleavage	STRUBBELIG-RECEPTOR FAMILY 3 precursor, putative, expressed	1
osa-miR812f	LOC_Os02g07960.2|13102.m00914|cDNA	2	11.001	1	24	3742	3765	ACGGAUGAUUAAAGUUGGACACGG	UUGCGUCCAACUUUAAUCGACCGU	Cleavage	STRUBBELIG-RECEPTOR FAMILY 3 precursor, putative, expressed	1
osa-miR812f	LOC_Os03g16220.4|13103.m01932|cDNA	3	8.424	1	23	1100	1122	ACGGAUGAUUAAAGUUGGACACG	UGUAUCCAACUUUAAUUUUCCGU	Cleavage	oxidoreductase, short chain dehydrogenase/reductase family domain containing protein, expressed	1
osa-miR812f	LOC_Os03g16220.6|13103.m12965|cDNA	3	7.135	1	23	1212	1234	ACGGAUGAUUAAAGUUGGACACG	UGUAUCCAACUUUAAUUUUCCGU	Cleavage	oxidoreductase, short chain dehydrogenase/reductase family domain containing protein, expressed	1
osa-miR812f	LOC_Os03g16220.1|13103.m01931|cDNA	3	7.135	1	23	1240	1262	ACGGAUGAUUAAAGUUGGACACG	UGUAUCCAACUUUAAUUUUCCGU	Cleavage	oxidoreductase, short chain dehydrogenase/reductase family domain containing protein, expressed	1
osa-miR812f	LOC_Os03g16220.2|13103.m01933|cDNA	3	8.424	1	23	1377	1399	ACGGAUGAUUAAAGUUGGACACG	UGUAUCCAACUUUAAUUUUCCGU	Cleavage	oxidoreductase, short chain dehydrogenase/reductase family domain containing protein, expressed	1
osa-miR812f	LOC_Os03g16220.3|13103.m01929|cDNA	3	7.132	1	23	1923	1945	ACGGAUGAUUAAAGUUGGACACG	UGUAUCCAACUUUAAUUUUCCGU	Cleavage	oxidoreductase, short chain dehydrogenase/reductase family domain containing protein, expressed	1
osa-miR812f	LOC_Os03g16220.5|13103.m01930|cDNA	3	8.424	1	23	2083	2105	ACGGAUGAUUAAAGUUGGACACG	UGUAUCCAACUUUAAUUUUCCGU	Cleavage	oxidoreductase, short chain dehydrogenase/reductase family domain containing protein, expressed	1
osa-miR812f	LOC_Os04g47140.1|13104.m04768|cDNA	1.5	22.369	1	24	655	678	ACGGAUGAUUAAAGUUGGACACGG	CAGCGCCCAACUUUGAUCAUCCGU	Cleavage	expressed protein	1
